# *In vitro* endoderm emergence and self-organisation in the absence of extraembryonic tissues and embryonic architecture

Stefano Vianello<sup>1</sup> ✉ and Matthias P. Lutolf<sup>1,2</sup> ✉

<sup>1</sup>Laboratory of Stem Cell Bioengineering, Institute of Bioengineering, School of Life Sciences (SV) and School of Engineering (STI), Ecole Polytechnique Fédérale de Lausanne (EPFL), Lausanne, Switzerland

<sup>2</sup>Institute of Chemical Sciences and Engineering, School of Basic Science (SB), EPFL, Lausanne, Switzerland

1 The endoderm is the cell lineage which gives rise in the  
2 embryo to the organs of the respiratory and gastrointestinal  
3 system. Uniquely, endodermal tissue does not just derive from  
4 descendants of the embryo proper (the epiblast) but instead  
5 arises from their gradual incorporation into an extraembryonic  
6 substrate (the visceral endoderm). Given the configuration of  
7 the early embryo, such a paradigm requires epiblast endoder-  
8 mal progenitors to negotiate embryonic compartments with  
9 very diverse epithelial character, a developmental contingency  
10 reflected by the fact that key early endodermal markers such  
11 as *Foxa2* and *Sox17* have been consistently found to be em-  
12 bedded within gene programmes involved in epithelialisation.  
13

14 To explore the underlying cell biology of embryonic endo-  
15 derm precursors, and to explore the relationship between  
16 endoderm development, epithelial identity, and extraembryo-  
17 nic mixing, we leveraged Gastruloids, *in vitro* models of  
18 early development. These self-organising three-dimensional  
19 aggregates of mouse embryonic stem cells do not possess an  
20 extraembryonic component, nor do they appear to display  
21 typical tissue architecture. Yet, they generate cells expressing  
22 endodermal markers. By tracking these cells throughout *in*  
23 *vitro* development, we highlight a persistent and uninterrupted  
24 pairing between epithelial and endodermal identity, with  
25 *FoxA2*/*Sox17*+ endoderm progenitors never transitioning  
26 through mesenchymal intermediates and never leaving the  
27 epithelial compartment in which they arise. We also docu-  
28 ment the dramatic morphogenesis of these progenitors into a  
29 macroscopic epithelial primordium extending along the entire  
30 anterior-posterior axis of the Gastruloid. Finally, we find  
31 that this primordium correctly patterns into broad domains  
32 of gene expression, and matures cells with anterior foregut,  
33 midgut, and hindgut identities within 7 days of culture. We  
34 thus postulate that Gastruloids may serve as a potential source  
35 of endodermal types difficult to obtain through classical 2D  
36 differentiation protocols.

37 gastruloid | endoderm development | epithelium | self-organisation | gut tube  
38 | foregut

39 Correspondence: [stefano.vianello@epfl.ch](mailto:stefano.vianello@epfl.ch) and [matthias.lutolf@epfl.ch](mailto:matthias.lutolf@epfl.ch)

## 40 Introduction

41 In mouse and humans, the digestive track, the respiratory  
42 system, and key internal organs such as the thymus, the  
43 bladder, the pancreas and the liver all derive from the same

44 progenitor tissue (Carlson, 2014; Lewis & Tam, 2006;  
45 Nowotschin et al., 2019a), a "mucous layer" first described  
46 in chick embryos (Pander, 1817), and which we now  
47 know as "endoderm" (Allman, 1854; Oppenheimer, 1940).  
48

49 In mouse, this "inner skin" actually first assembles on  
50 the outer surface of the embryo, through a unique choreogra-  
51 phy of cellular movements illustrated in Figure 1 (Burtscher  
52 & Lickert, 2009; Kwon et al., 2008; Probst et al., 2021;  
53 Viotti et al., 2014). As the mouse embryo implants into the  
54 uterus of the mother, and extraembryonic tissues proliferate  
55 to impart to the conceptus its characteristic cylindrical shape  
56 (Smith, 1985), the mouse embryo (at the very tip of such  
57 cylinder) is little more than an epithelial mass of potent cells:  
58 the epiblast. Remarkably, such inconspicuous tissue will act  
59 as the origin of almost all cells of the developing embryo  
60 through the transformations brought about by gastrulation,  
61 key milestone of all embryonic development. As such, the  
62 initially multipotent and uncommitted cells of the early epi-  
63 blast commit to specific fates, which are generally classified  
64 into the broad germ layer categories of ectoderm (skin and  
65 neural types), mesoderm (heart, muscles, and mesenchyme),  
66 and endoderm (internal organs, respiratory and digestive  
67 tract) (Arnold & Robertson, 2009; Takaoka & Hamada,  
68 2012; Tam & Behringer, 1997; Tam & Loebel, 2007).  
69

70 Yet we now know that at least one of these germ lay-  
71 ers, the endoderm, does not come entirely from cells  
72 originating in the epiblast (Kwon et al., 2008; Nowotschin  
73 et al., 2019a,b; Viotti et al., 2014). Blurring the boundaries of  
74 prevalent developmental paradigms, and making such quali-  
75 fiers somehow oxymoronic, "extraembryonic" cells (i.e. cells  
76 that segregated away from the epiblast early on even before  
77 implantation) also contribute to the embryo, and specifically  
78 to its endoderm-derived tissues. Indeed, the epiblast is not  
79 isolated from other tissues within the conceptus, and it is  
80 actually enveloped by a thin epithelium of so-called Visceral  
81 Endoderm (Figure 1A, in yellow). This latter sheet of cells  
82 on the surface of the epiblast is what one would classify as  
83 extraembryonic tissue, originating from much earlier lineage  
84 segregation events (Chazaud et al., 2006). Originally thought  
85 to be displaced away as the embryo develops, this thin sheet

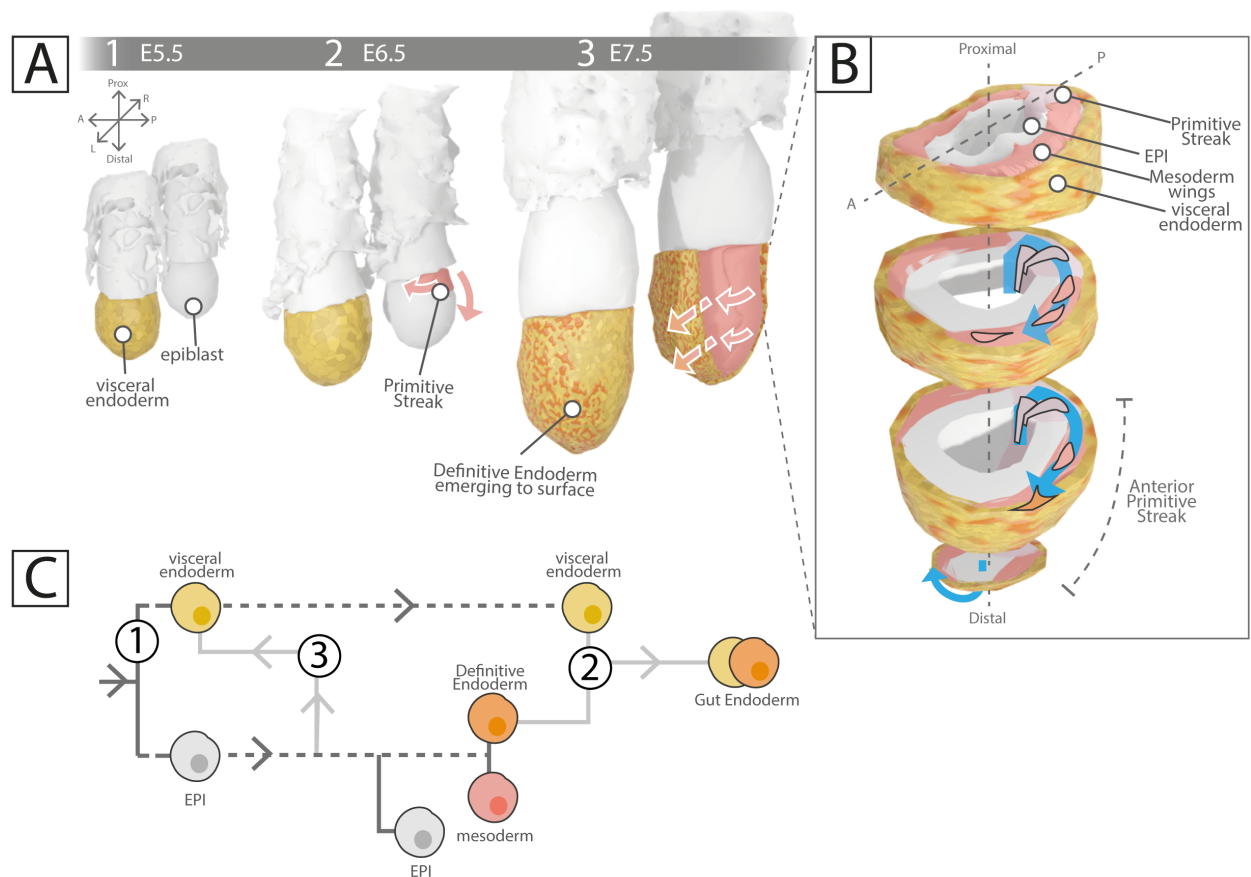

**Fig. 1. Endoderm development in the mouse embryo.** (A) Intercalation of (embryonic) definitive endoderm cells (orange) into the visceral endoderm epithelium (yellow, extraembryonic), during peri-gastrulation stages of mouse development. Embryos in the back row are represented with their visceral endoderm layer removed. In red, mesodermal cells emerging from the primitive streak and starting their posterior-to-anterior circumnavigation of the epiblast. (B) Exploded view of the mouse embryo at around E7.5, as if sectioned proximo-distally. At the posterior of the epiblast a zone of EMT (primitive streak, light purple) advancing towards the distal tip of the embryo mediates epiblast cell egression. Cells specified to mesoderm (red cells) leave the epiblast and form so-called mesodermal wings as they circumnavigate the epiblast. They are sandwiched between the epiblast they just left (gray), and the overlying visceral endoderm (yellow). Definitive endoderm cells (orange) transit only shortly within the mesodermal compartment, and instead egress into the visceral endoderm. (C) The multiple origins of endodermal cells, as adapted from (Nowotschin et al., 2019b). 1) visceral endoderm cells, originating from earlier segregation between "embryonic" and "extraembryonic" cell types in the blastocyst, 2) intermixing with definitive endoderm cells arising from gastrulation (see previous panels), 3) direct delamination from the epiblast prior to gastrulation. E = embryonic day.

86 of "extraembryonic" cells is the primary destination of a 104  
 87 subset of cells produced by the epiblast (i.e. embryonic 105  
 88 cells, in orange throughout Figure 1A), that these embryonic 106  
 89 cells are those that will make endoderm, and as such that the 107  
 90 visceral endoderm "extraembryonic" sheet in which these 108  
 91 cells intercalate becomes itself an integrated component of 109  
 92 later embryonic structures (Burtscher & Lickert, 2009; Kwon 110  
 93 et al., 2008; Nowotschin et al., 2019b; Viotti et al., 2014). 111  
 94 112

95 What is the current model for how this process starts 113  
 96 and unfolds? At around embryonic day (E)6.25 asymmetric 114  
 97 signalling by extraembryonic tissues surrounding the epiblast 115  
 98 break its symmetry (Stower & Srinivas, 2018; Takaoka & 116  
 99 Hamada, 2012). One side of the epiblast starts becoming 117  
 100 different from the rest (Figure 1A.2). At this side, which 118  
 101 is defined as the posterior of the embryo and at which 119  
 102 extraembryonic tissues concentrated high Wnt, BMP, and 120  
 103 FGF signalling activity, epiblast cells respond by engaging 121

so-called Epithelial to Mesenchymal Transition (EMT) 122  
 programmes: they start losing attachment with the rest 123  
 of the epithelium, they become motile and mesenchymal, 124  
 they leave the epiblast (Arnold & Robertson, 2009; Tam & 125  
 Behringer, 1997; Tam & Loebel, 2007). Morphologically, 126  
 the so-called Primitive Streak appears: a distally-expanding 127  
 zone of EMT leading to delamination of epiblast cells and 128  
 simultaneous commitment to embryonic fates (Hashimoto 129  
 & Nakatsuji, 1989; Williams et al., 2011). As epiblast cells 130  
 undergo EMT and leave the epiblast, they start circumnav- 131  
 132 igating its outer surface, sandwiched under the overlying 133  
 visceral endoderm, forming wings of tissue converging 134  
 towards the anterior of the embryo ((Hashimoto & Nakatsuji, 135  
 1989; Saykali et al., 2019; Viotti et al., 2014); red intervening 136  
 tissue in Figure 1A.2 and 1A.3, and red cell trajectory in 137  
 Figure 1B). These cells will generate mesodermal 138  
 derivatives, heart and muscles (Tam & Behringer, 1997). 139  
 140  
 141

122 Within the mesodermal compartment of the embryo 179  
123 another cell type finds its way: endodermal cells. Like meso- 180  
124 dermal cells, these cells were once epiblast cells that left 181  
125 that epithelium to egress into the mesodermal compartment 182  
126 (Burtscher & Lickert, 2009; Probst et al., 2021). Rather 183  
127 than remaining within these wings of mesoderm however, 184  
128 endodermal cells start establishing contacts with the over- 185  
129 laying epithelium, the visceral endoderm, into which they 186  
130 eventually integrate (orange cell in Figure 11B; (Burtscher 187  
131 & Lickert, 2009; Kwon et al., 2008; Viotti et al., 2014)). 188  
132 The outer surface of the embryo thus quickly becomes a 189  
133 mosaic of its original resident population, that of visceral 190  
134 endoderm cells, and of an increasing number of ingressing 191  
135 and intercalating endoderm cells of embryonic (epiblast) 192  
136 origin, so-called Definitive Endoderm cells ((Burtscher & 193  
137 Lickert, 2009; Kwon et al., 2008; Viotti et al., 2014); orange 194  
138 cells in Figure 1A.3). This sheet of cells will later form 195  
139 pockets at the anterior and posterior of the embryo, and 196  
140 finally fold along its midline to close into a tube that will end 197  
141 up internalised within the embryo (not illustrated; (Carlson, 198  
142 2014; Lewis & Tam, 2006; McGrath & Wells, 2015)). The 199  
143 gut tube has formed, and along its entire length progeni- 200  
144 tors of all endoderm-derived visceral organs will emerge 201  
145 and take shape (Carlson, 2014; McGrath & Wells, 2015). 202  
146 203  
147 Clearly then, what ultimately becomes the tissue we 204  
148 refer to as "gut endoderm", i.e. the endodermal sheet which 205  
149 folds and closes to give rise to the embryonic gut tube, is 206  
150 thus actually a mixture of cells of very different origins, even 207  
151 though these converge towards similar (yet not identical) 208  
152 endpoint molecular signatures (Nowotschin et al., 2019a,b; 209  
153 Viotti et al., 2014). The multiple contributions to gut 210  
154 endoderm described above are summarised in Figure 1C (as 211  
155 adapted from e.g. (Nowotschin et al., 2019a)). In addition 212  
156 to the first contribution of Visceral Endoderm cells by early 213  
157 segregation within the inner cell mass of the early embryo 214  
158 (Figure 1C.1), and to the later intercalation of Definitive 215  
159 Endoderm cells (Figure 1C.2), we also highlight a third 216  
160 source of cells: epiblast cells bypassing EMT and altogether 217  
161 bypassing transit within the mesodermal compartment of the 218  
162 embryo. These cells leave the epiblast to directly intercalate 219  
163 into the visceral endoderm, a contribution that has been 220  
164 documented to occur at the distal tip of the pre-gastrulation 221  
165 mouse embryo, zone of maximal mechanical stress (Hira- 222  
166 matsu et al., 2013; Matsuo & Hiramatsu, 2017), and that 223  
167 has found support from single-cell transcriptome analyses 224  
168 (Nowotschin et al., 2019b). Direct epiblast to endoderm 225  
169 transitions are particularly interesting, as even endodermal 226  
170 progenitors that do classically egress from the epiblast 227  
171 into the mesodermal space might do so by EMT processes 228  
172 different than those governing the egression and specification 229  
173 of mesoderm (Bardot & Hadjantonakis, 2020; Burtscher & 230  
174 Lickert, 2009; Probst et al., 2021), and the issue remains con- 231  
175 tentious. Currently, data suggests that egressing endodermal 232  
176 progenitors do not completely lose their epithelial character 233  
177 but instead transiently redistribute their surface adhesion 234  
178 molecules as they travel along the mesodermal compartment, 235

until they contact their new epithelial niche, the visceral  
endoderm, and fully repolarise (Bardot & Hadjantonakis,  
2020; Kwon et al., 2008; Nowotschin et al., 2019a; Viotti  
et al., 2014). Indeed, recent transcriptional comparisons  
have confirmed that endodermal progenitors show reduced  
expression of EMT and migration determinants compared  
to their mesodermal counterparts, suggesting separate  
and distinct modes of delamination (Probst et al., 2021)

Uncertainty remains regarding many of the steps de-  
scribed above, and on the exact nature of the transition states  
that embryonic endoderm precursors traverse as they leave  
epiblast potency and refine endodermal identity (Bardot &  
Hadjantonakis, 2020; Ferrer-Vaquier et al., 2010; Lewis &  
Tam, 2006). Notably, evidence for so-called "mesendoderm-  
al progenitors", whereby bipotential cells able to give rise  
to both mesoderm and endoderm would exist within or out-  
side the epiblast, is debated in mouse (Lewis & Tam, 2006)  
despite the clear existence of such progenitor state in other  
developmental models (e.g. sea urchin and roundworms;  
(Peter & Davidson, 2010; Sulston et al., 1983)). Certainly,  
segregation between the two germ layers in the mouse is  
documented already at very early stages, and actually within  
the very pre-streak epiblast (Burtscher & Lickert, 2009;  
Probst et al., 2021) and most recent explorations of the topic  
appear to indicate that endomesodermal progenitors do not  
stably arise during early endoderm development *in vivo*  
(Mittenzweig et al., 2021; Probst et al., 2021). Uncertainty  
also remains on whether endodermal cells egress from the  
epiblast through mechanisms common to those of egressing  
mesodermal cells or through alternative mechanisms.  
Crucially, the transcriptional similarity between endoderm  
(but not mesoderm) progenitors with epiblast cells (Probst  
et al., 2021), the observation that endodermal cells can be  
seen to have left the epiblast in regions which the primitive  
streak has not yet reached (Burtscher & Lickert, 2009), and  
that those within mesoderm wings of the embryo have not  
lost their epithelial identity (Viotti et al., 2014) raise interest  
in the relationship between epitheliality and endodermal  
identity (Ferrer-Vaquier et al., 2010; Nowotschin et al.,  
2019a; Viotti et al., 2014). Given the recent spotlight on  
the mixed composition and distribution of gut endoderm  
cells (Nowotschin et al., 2019b), one also wonders whether  
extraembryonic and embryonic endoderm cells play distinct  
essential roles within this primordium and its derivatives.  
In embryos where embryonic endoderm precursors can-  
not integrate their extraembryonic substrate and remain  
trapped within the mesodermal compartment, these seem  
to lose their identity and embryos do not form midgut  
and hindgut (Kanai-Azuma et al., 2002; Viotti et al., 2014).

As a platform to explore the underlying cell biology of  
embryonic endoderm precursors, and to explore the rela-  
tionship between endoderm development, epithelial identity,  
and extraembryonic mixing, we use Gastruloids (Beccari  
et al., 2018; Turner et al., 2017; van den Brink et al., 2014).  
These stem cell aggregates develop *in vitro* in times and

236 patterns that are surprisingly but consistently reminiscent of 232  
237 *in vivo* embryonic development. While mainly characterised 233  
238 in terms of mesodermal and neuromesodermal development 234  
239 (van den Brink et al., 2020), they have been crucially also 235  
240 found to specify endodermal identities ((Anlaş et al., 2021; 236  
241 Beccari et al., 2018; Cermola et al., 2019; Pour et al., 2019; 237  
242 Turner et al., 2017; van den Brink et al., 2014; Veenvliet 238  
243 et al., 2020); see also Discussion). Work with this system 239  
244 reflects a paradigm whereby leaving cells to their own 240  
245 self-organisation exposes intrinsic cellular programmes and 241  
246 developmental modules that would be otherwise masked by 242  
247 the regulative context of normal embryonic development 243  
248 (Davies, 2017; Shahbazi & Zernicka-Goetz, 2018; Turner 244  
249 et al., 2016). In this perspective, the absence of typical em- 245  
250 bryonic architecture, compartmentalisation, and extraembry- 246  
251 onic tissues, makes Gastruloids particularly suitable to study 247  
252 the relevance of these features to endoderm development. 248

253  
254 We here highlight a persistent and uninterrupted pair- 249  
255 ing between epithelial and endodermal identity, with 250  
256 FoxA2+/Sox17+ endoderm progenitors never transitioning 251  
257 through mesenchymal intermediates and never leaving 252  
258 the epithelial compartment in which they arise. We also 253  
259 document the dramatic morphogenesis of these progenitors 254  
260 into a macroscopic epithelial primordium extending along 255  
261 the entire anterior-posterior axis of the Gastruloid, patterned 256  
262 into broad domains of gene expression. Finally, we show 257  
263 that Gastruloids appear to give rise to patterned mature 258  
264 endodermal identities corresponding to the entire spectrum 259  
265 of fates observed in the embryonic gut tube, with notable 260  
266 representation of anterior foregut, midgut, and hindgut types. 261  
267 Corollarily we also highlight a strong epithelial component in 262  
268 Gastruloids, and thus the spontaneous emergence *in vitro* of 263  
269 stratified architectures and germ layer compartmentalisation. 264

## 270 Results

271 To investigate the emergence, dynamics, and patterning of 265  
272 endoderm progenitors *in vitro* we started by generating Gas- 266  
273 truloids (Baillie-Johnson et al., 2015; Beccari et al., 2018; 267  
274 van den Brink et al., 2014). Accordingly, we aggregated 300 268  
275 mouse embryonic stem cells of a TBra/Sox1 double reporter 269  
276 line (described in (Deluz et al., 2016)) whose output Gastru- 270  
277 loids have been extensively characterised in published litera- 271  
278 ture and for which we have documented expression of mark- 272  
279 ers of all three germ layers (Beccari et al., 2018); see Ma- 273  
280 terials & Methods). As expected, when 300 of these mouse 274  
281 embryonic stem cells are seeded in individual wells of a low- 275  
282 adhesion 96well plate and maintained in N2B27 medium, 276  
283 these sediment to the bottom of the well and aggregate to- 277  
284 gether in the first 48h of culture to form a compact sphere 278  
285 with defined edges by 72h (Figure 2). A pulse of the glyco- 279  
286 gen synthase kinase (GSK) 3 inhibitor (CHIR99021 (Chiron) 280  
287 is then applied as a trigger of "gastrulation" and as to mimic 281  
288 the increase in Wnt signalling experienced by cells of the 282  
289 posterior mouse epiblast. Accordingly, the aggregate breaks 283  
290 symmetry (Figure 2A, asterisk). Morphologically, the spher- 284  
291 ical 72h aggregate becomes oblong by 96h, and extends a 285

long protrusion that grows over time (120h, 144h). This pos-  
terior protrusion is marked by *TBra* (Brachyury) expression,  
marker of the posterior primitive streak and of the embryonic  
tail bud, and found to similarly define the posterior of the  
Gastruloid (Beccari et al., 2018; Turner et al., 2017; van den  
Brink et al., 2014).

## Emergence and patterning of endodermal markers.

**Emergence of early endodermal markers.** In the embryo,  
precursors of the definitive endoderm appear to be found  
within epiblast cells marked by expression of the transcrip-  
tion factor FOXA2 (Burtscher & Lickert, 2009; Probst et al.,  
2021). These FOXA2+ cells would be initially intermingled  
with TBra+ (TBXT) cells at the proximal posterior side of  
the embryo, and then resolve as a homogeneous FOXA2+  
population marking the distal portion of the epiblast, and  
thus the epiblast region anterior to the leading edge of the  
primitive streak (Bardot et al., 2017; Burtscher & Lickert,  
2009; Probst et al., 2021). While cells in the intervening  
epiblast region and co-expressing *FoxA2* and *TBra* may be  
progenitors of cardiac mesoderm types (Bardot et al., 2017),  
FOXA2+ cells of the distal epiblast are posited to leave the  
columnar epithelium, upregulate *FoxA2*, and move within the  
wings of mesoderm enveloping the epiblast ((Burtscher &  
Lickert, 2009; Kwon et al., 2008; Probst et al., 2021; Viotti  
et al., 2014), see also Figure 1B). FOXA2+ cells that contact  
the overlaying visceral endoderm would upregulate *Sox17*  
(Viotti et al., 2014), leave the mesodermal domain, integrate  
within this new epithelium, and join the cohort of cells that  
will eventually form the gut endoderm (Burtscher & Lickert,  
2009; Kwon et al., 2008; Viotti et al., 2014). Given the  
relevance of *FoxA2* and *Sox17* for endoderm development  
(Dufort et al., 1998; Kanai-Azuma et al., 2002; Monaghan  
et al., 1993; Sasaki & Hogan, 1993), and their prevalent  
use in the gastruloid/embryoid literature as early endoderm  
markers (Beccari et al., 2018; Pour et al., 2019; Turner  
et al., 2017; van den Brink et al., 2014; Veenvliet et al.,  
2020), we decided to track their emergence and patterns of  
expression at the earliest stages of Gastruloid development.

At 72h, when the Gastruloid is still spherical and has  
just received the CHIR stimulus that will drive it through dif-  
ferentiation and morphogenesis, FOXA2+ cells can be seen  
scattered throughout the aggregate, intermingled with TBra+  
cells (Figure 2B.1, 72h). Just 24h later (t=96h), and as TBra+  
cells resolve into a pole that will accordingly define the pos-  
terior of the Gastruloid (van den Brink et al., 2014), FOXA2+  
cells form clusters and segregate away from the TBra+ pole  
along the newly defined axis of the aggregate (Figure 2B.1,  
96h). While few FOXA2+/TBra+ (double-positive) cells  
can be distinguished at this stage, most cells are either  
TBra+ at the posterior of the Gastruloid, or FOXA2+ as  
scattered clusters along the anterior (Figure 2B.1, bottom).

In contrast to TBra and FOXA2, SOX17 cannot be de-  
tected at t=72h, but only starts appearing later (Figure 2B.2).  
At t=96h, scattered unclustered SOX17+ cells appear within

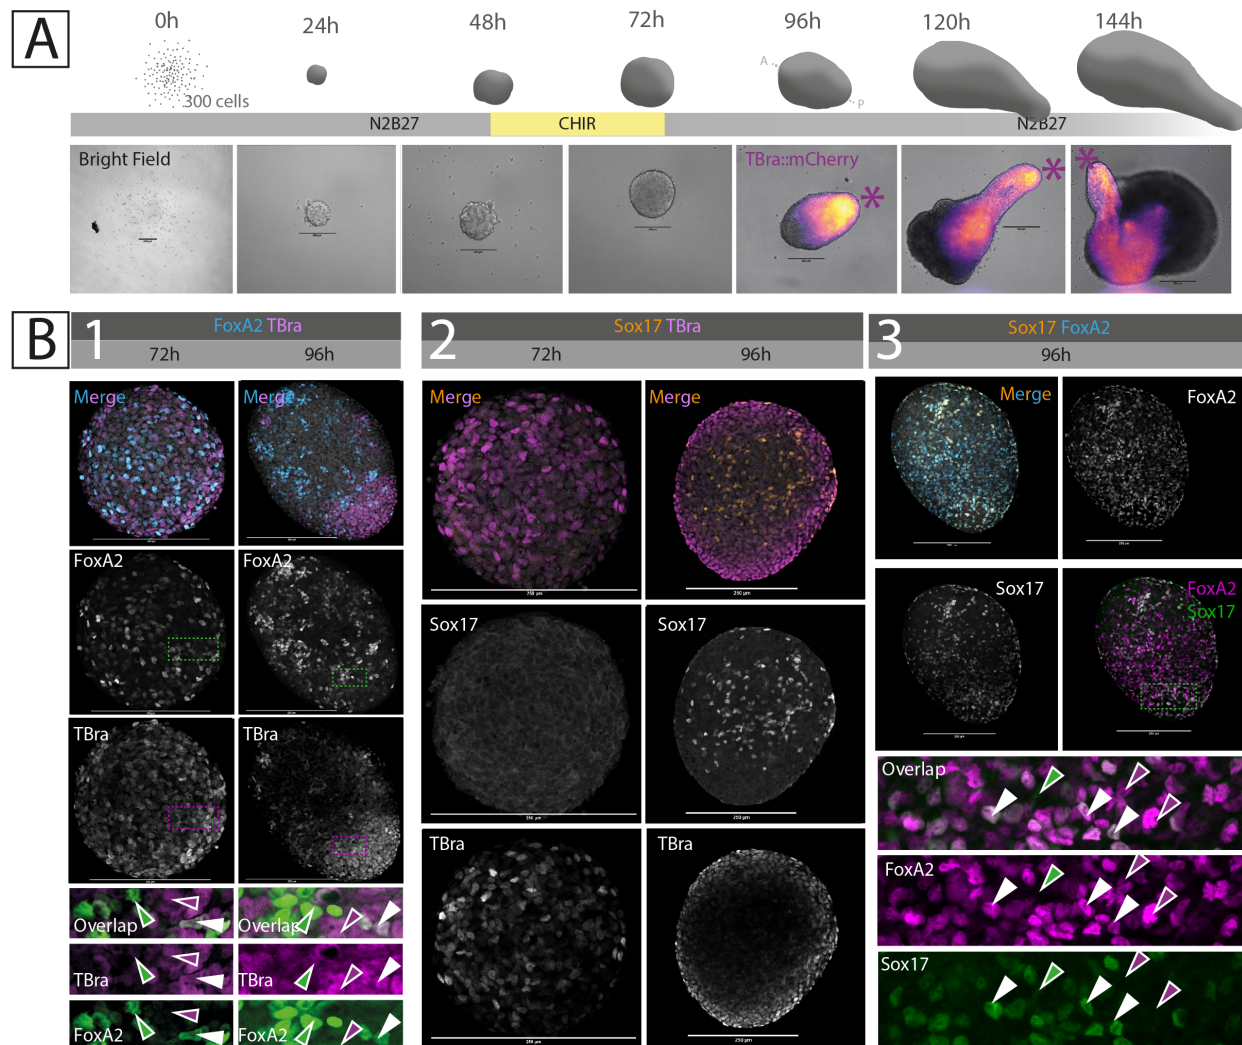

**Fig. 2. Emergence and patterning of endodermal markers in Gastruloids.** (A) Summary schematic of the Gastruloid generation protocol (see Methods), and brightfield pictures of representative Gastruloids all along their development *in vitro*. Note that the fluorescence channel is here shown from  $t=96h$  onward only (when the Gastruloid becomes polarised). Reporter expression starts at  $t=72h$ , homogeneously throughout the spheroid (see (Turner et al., 2017)). (B) Immunostaining against the posterior epiblast and primitive streak marker TBra, and classical endodermal progenitor markers FoxA2 and Sox17, at 72h and 96h of Gastruloid development. SOX17+ cells appear one day later TBra+ and FOXA2+ cells, and are a nearly exclusive subset of the latter. Marker colocalisation is shown in green and magenta, with double-positive cells appearing white (examples of single-positive and double-positive cells highlighted by single-colour and white arrowheads respectively). Scale bar is always 250 $\mu m$ . Asterisk indicates the posterior of the Gastruloid (based on TBra expression).

the elongating Gastruloid, and co-staining for FOXA2 shows 361  
 these cells as representing a nearly exclusive subset of the 362  
 FOXA2+ population (Figure 2B.3). We thus observe, at the 363  
 earliest timepoints of Gastruloid response to CHIR, ordered 364  
 emergence of key endodermal markers in sequence and pat- 365  
 terns that are consistent with what is observed in the embryo. 366  
 Not only SOX17+ cells emerge later and within a population 367  
 of FOXA2+ cells (as seen in the embryo, (Viotti et al., 368  
 2014)), these cells sort from an initially TBra-intermingled 369  
 population to later define posterior and anterior domains 370  
 along the AP axis of the Gastruloid, just as is observed in the 371  
 epiblast of the early primitive streak embryo (Burtscher & 372  
 Lickert, 2009; Probst et al., 2021). 373  
 374

**Cellular biology of endodermal cells.** *In vivo*, FoxA2+ (and  
 thus Sox17+) cells are expected to occupy and traverse very  
 different embryonic compartments throughout their journey.  
 As such, FOXA2+ cells would first emerge within the  
 columnar epithelial tissue of the epiblast, they would then  
 egress and mix with the mesenchymal mesodermal cell types  
 circumnavigating the embryo as mesodermal wings, and  
 they would finally re-integrate the epithelium on the surface  
 of the embryo ((Kwon et al., 2008; Viotti et al., 2014), as  
 illustrated in Figure 1B). Sox17 expression appears to be  
 even more intimately associated with transitions between  
 compartments, and has been reported to be expressed once  
 endodermal precursors contact and integrate within the  
 surface epithelium (Viotti et al., 2014). We thus sought to

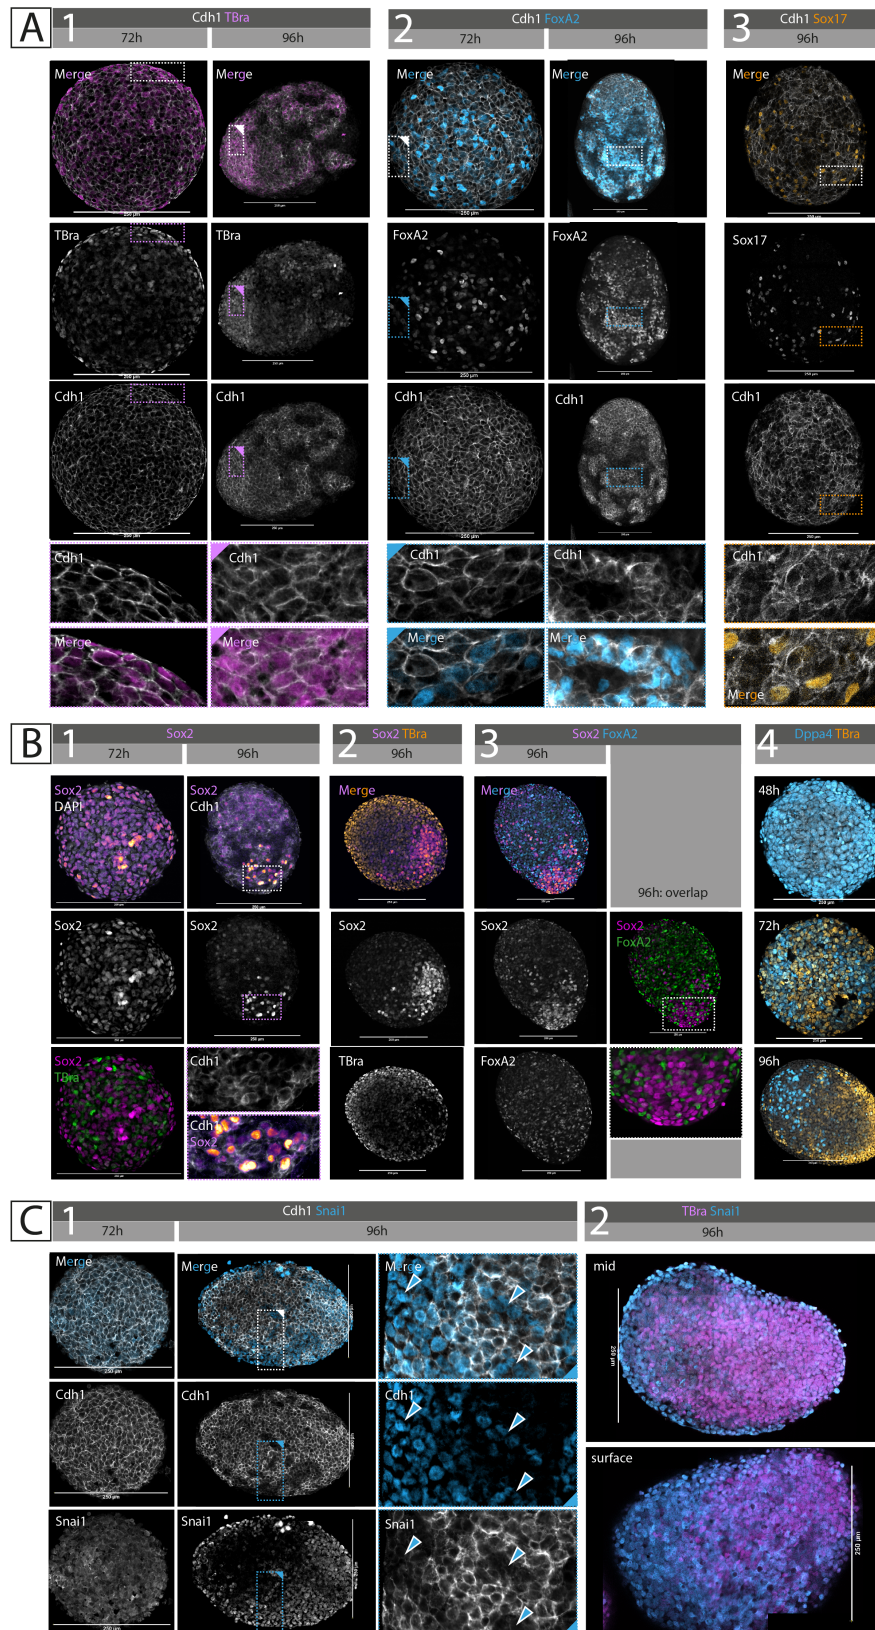

**Fig. 3. Endoderm progenitors are epithelial in nature, reside within an epiblast-like compartment, and are spared by classical EMT.** (A) Immunostaining against the epithelial molecule E-cadherin (Cdh1) at 72h and 96h of Gastruloid development. Notice the drastic fragmentation of epithelial integrity between the two timepoints. Co-stained, are the posterior epiblast and primitive streak marker TBra, and classical endodermal progenitor markers FoxA2 and Sox17. Cells expressing either marker are consistently also CDH1+. (B) Immunostaining against the epiblast marker Sox2 shows its segregation at the anterior of the 96h Gastruloid, thus defining a separate domain from FoxA2+ cells. A similar pattern is highlighted by the pluripotency marker Dppa4. (C) Immunostaining against the classic EMT regulator Snai-1 (Snai1) shows patterns of expression complementary to those of CDH1. Snai1-mediated EMT is widespread throughout the 96h Gastruloid, and marks cells enveloping the aggregate. Scale bar is always 250µm. Marker colocalisation is shown in green and magenta, with double-positive cells appearing white (examples of single-positive and double-positive cells highlighted by single-colour and white arrowheads respectively)

375 resolve whether cells expressing endodermal markers in 432  
376 Gastruloids were equivalently moving across compartments, 433  
377 with particular attention to their epithelial identity. Indeed, 434  
378 we observe SOX17+ cells in the absence of surface epithelial 435  
379 layer on which these would eventually integrate *in vivo*. 436  
380  
381 Co-staining for the the epithelial marker CDH1 (E-cadherin, 438  
382 adherens junction) shows that both TBra+ and FOXA2+ 439  
383 cells specified within the t=72h Gastruloid are emerging 440  
384 within a cellular aggregate that is uniformly epithelial (or, 441  
385 at least, epithelioid since epithelial architecture is missing, 442  
386 Figure 3A), consistently with the epithelial context of the 443  
387 epiblast of the early gastrulation embryo in which TBra+ 444  
388 and FOXA2+ cells have been described to first emerge 445  
389 (Burtscher & Lickert, 2009; Lee et al., 2007; Probst et al., 446  
390 2021). Cells of the t=72h Gastruloid all show homoge- 447  
391 neous membrane CDH1 localisation, as likely expected 448  
392 for an aggregate of embryonic stem cells transitioning to- 449  
393 wards EpiSC states (Hamidi et al., 2020; Turner et al., 2017). 450

394  
395 Interestingly, the CDH1 landscape of the t=96h Gastru- 452  
396 loid, one day later, is radically different: as Gastruloids 453  
397 respond to the CHIR pulse, CDH1 expression becomes 454  
398 patchy. The original CDH1 continuum of the 72h spherical 455  
399 Gastruloid displays signs of clear fragmentation by t=96h 456  
400 (Figure 3A). At the posterior, CDH1+ cells remain clustered 457  
401 and maintain expression of TBra in a configuration analogous 458  
402 to that of the epiblast of the posterior or incipient primitive 459  
403 streak ((Burtscher & Lickert, 2009; Herrmann, 1991), Figure 460  
404 3A.1), while anteriorly CDH1 continuity is increasingly 461  
405 interrupted by intervening non-epithelial cells (interpreted 462  
406 to be mesoderm). Very interestingly, all FOXA2+ cells seen 463  
407 at this stage are contained within this disaggregating CDH1 464  
408 core, just as the newly specified SOX17+ cells emerging 465  
409 within such FOXA2+ population (Figure 3A.2 and Figure 466  
410 3A.3). We never observe FOXA2+ or (FOXA2+)/SOX17+ 467  
411 cells outside of the perimeter defined by the CDH1+ islands. 468

412  
413 These findings are particularly significant in that one 470  
414 might naively expect to observe FOXA2+ cells to be leaving 471  
415 their CDH1+ ("epiblast") substrate and for FOXA2+ and 472  
416 FOXA2+/SOX17+ cells to be found in the emerging mes- 473  
417 enchymal compartment. Significantly however, FOXA2+ 474  
418 cells leaving the epiblast *in vivo* do not lose CDH1 expres- 475  
419 sion either, but rather relocalise it isotropically until they 476  
420 make contact with and reintegrate the overlaying visceral 477  
421 endoderm (Viotti et al., 2014). The isotropic CDH1 starting 478  
422 point of the Gastruloid at t=72h might thus reconcile *in* 479  
423 *vitro* and *in vivo* findings by explaining the retention of 480  
424 SOX17+ cells in the original "epiblast" compartment. Cer- 481  
425 tainly, the observation of such pervasive CDH1 expression 482  
426 within Gastruloids, at least those derived from the stem cell 483  
427 line used in this study (see Discussion), challenged our pre- 484  
428 conception of Gastruloids as mainly mesenchymal organoids. 485

429  
430 To test the underlying identity of the Cdh1 domain of t=72h 486  
431 and t=96h Gastruloids, and to check whether endodermal 487  
488

identities were indeed emerging and remaining associated 489  
with an "epiblast"-like domain, we co-stained Gastruloids for 490  
pluripotency and epiblast markers (Figure 3B). Staining for 491  
SOX2 shows that the t=72h spheroid is indeed a collection 492  
of SOX2+ cells (maintained from earlier timepoints, see data 493  
in (Beccari et al., 2018)), and newly emerging TBra+ cells 494  
(Figure 3B.1). As such the emerging scattered FOXA2+ 495  
population at this stage (also intermingled with TBra+ cells) 496  
is likely emerging on this very CDH1+/SOX2+ substrate. 497  
Yet, as gastruloid "gastrulation" progresses, the fragmenting 498  
epithelial compartment only maintains high SOX2 at a pole 499  
(opposite to the TBra pole, i.e. at the anterior, Figure 3B.2), 500  
such that the rest of the epithelium, where FOXA2+ and 501  
TBra+ identities segregate, shows low or no SOX2 (Figure 502  
3B.3). A similar pattern of segregation and maintenance 503  
of potency at the anterior tip of the t=96h gastruloid is 504  
highlighted by the observed dynamics of the pluripotency 505  
marker DPPA4, marking the entire stem cell aggregate at 506  
t=48h, segregating from emerging TBra+ cells at t=72h, 507  
and being restricted at the anterior by t=96h (Figure 3B.4).

Our observations are consistent with a model where 508  
endodermal identities differentiate without ever leaving the 509  
epiblast compartment, or at least where endodermal precu- 510  
sors retain CDH1 expression throughout their development. 511  
Indeed, the CDH1+ mass of the t=96h Gastruloid may itself 512  
represent different embryonic compartments: one of epiblast, 513  
maintaining potency markers at the anterior and downregu- 514  
lating SOX2 at the posterior where FOXA2+ and TBra+ cells 515  
segregate to define respectively distal and proximal posterior 516  
epiblast identities, and one of FOXA2+/SOX17+ endodermal 517  
precursors that would normally be found in the mesenchymal 518  
compartment of the embryo but here remain attached to the 519  
"epiblast" given the isotropic CDH1 expression of all other 520  
compartments. In either case, we strengthen the case for 521  
direct epiblast-to-endoderm transitions that may not require 522  
classic EMT or transitions through so-called mesendodermal 523  
intermediates (Ferrer-Vaquero et al., 2010; Kubo et al., 2004; 524  
Lewis & Tam, 2006; Pfendler et al., 2005; Tada et al., 2005).

**Gastruloids undergo widespread EMT, which spares endo-**  
**dermal precursors.** To test whether the observed fragmenta- 525  
tion of the epithelial core of the Gastruloid is consistent with 526  
EMT-like processes one would expect for an *in vitro* model 527  
of gastrulation, and how this relates to the apparent failed 528  
EMT of endodermal precursors in the Gastruloid, we per- 529  
formed immunostaining for the EMT master regulator Snail 530  
(SNAI1) ((Cano et al., 2000; Carver et al., 2001), Figure 3C).

While SNAI1 is only detected at low levels in the cy- 531  
toplasm of cells of t=72h Gastruloids (all CDH1 positive, 532  
as shown before), large swathes of cells with strong nuclear 533  
SNAI1 signal are observed at t=96h (Figure 3C.1). Crucially, 534  
these patches of SNAI1+ cells are consistently observed 535  
to mark the cells intervening between fragments of the 536  
CDH1 core. Optical cross-sections at the midplane of 537  
t=96h Gastruloids show SNAI1+ cells forming an enve- 538  
lope at the surface, and establishing a posterior to anterior

489 gradient in continuity with the TBra+ posterior (Figure 3C.2). 545  
490 546  
491 We thus notice that Gastruloid "EMT" seems to be a gen- 547  
492 eralised rather than localised process, originating at several 548  
493 points within the CDH1+ "epiblast" substrate. Alternatively, 549  
494 SNAI1+ mesodermal types originating from a localised EMT 550  
495 origin may be migrating and physically displacing CDH1+ 551  
496 cells, leading to the observed fragmented appearance. 552  
497 Regardless, the retention of FOXA2+ cells within CDH1+ 553  
498 islands, in an environment of widespread EMT, seems to 554  
499 suggest that these cells are not leaving the epiblast and 555  
500 are either transitioning through endodermal differentiation 556  
501 within their original epiblast-like environment or attempting 557  
502 to leave the epithelium by Snai1-independent mechanisms 558  
503 (Bardot & Hadjantonakis, 2020; Probst et al., 2021) and 559  
504 either rapidly reintegrating it at short timescales or remain- 560  
505 ing attached to it through homotypic CDH1 interactions. 561

## 508 Formation of an endoderm-like primordium.

509 **The epithelial core of the Gastruloids undergoes dramatic** 567  
510 **architectural rearrangements.** To evaluate the later fate of 568  
511 endodermal cells within the gastruloid core, we further 569  
512 tracked Cdh1, FoxA2, and Sox17 patterns of expression 570  
513 as the Gastruloid undergoes morphogenesis and elonga- 571  
514 tion from t=96h onward ((Beccari et al., 2018), Figure 4). 572  
515 573  
516 Strikingly, the fragmented CDH1+ core of the t=96h 574  
517 Gastruloid gradually re-organises in complex and stream- 575  
518 lined elongated architectures extending along the entire 576  
519 length of the Gastruloid (Figure 4A). Over time, the 577  
520 tear-drop shaped, fragmented CDH1+ core of the t=96h 578  
521 Gastruloid tapers into a multi-branched, whisk-shaped 579  
522 epithelial primordium (t=120h, 144h), which in turn resolves 580  
523 in a single rod-like tissue that follows the outer geometry 581  
524 of the Gastruloid (144h onward). This epithelial structure, 582  
525 consistently seen in all (n = 97/99 imaged Gastruloids, N 583  
526 = 6 independent experiments) samples (Figure 5), emerges 584  
527 on the surface of the Gastruloid at the very posterior (and 585  
528 is indeed an extension of it), sometimes displaying multiple 586  
529 surface points in the region (white arrowhead Figure 4A, 587  
530 right), and occasionally also resurfaces at the anterior at 588  
531 much later timepoints (t=168h). Crucially, cells of this 589  
532 epithelial core are marked by FoxA2 at all stages of de- 590  
533 velopment (Figure 4A, bottom row). Macroscopically, this 591  
534 epithelial mass is already distinguishable in brightfield as 592  
535 a rod-like structure of compact cells extending from the 593  
536 posterior and gradually becoming enveloped by anteriorly- 594  
537 extending wings of looser, mesenchymal-like cells (Figure 595  
538 4B.1). Co-staining of CDH1 with the pan-mesodermal 596  
539 marker FoxC1 (Sasaki & Hogan, 1993) clearly identifies 597  
540 the enveloping tissue as mesodermal (whose differentiation 598  
541 will give rise to the variety of trunk and cardiac structures 599  
542 described in (Rossi et al., 2019; van den Brink et al., 2000; 600  
543 Veenvliet et al., 2020)) and highlights a multilayered 601  
544 architectural organisation of the Gastruloid model, with

interfacing epithelial and mesenchymal tissue (Figure 4B.2). Interestingly, such coupled configuration raises the possibility that the two compartments may engage in productive developmental interaction, possibly stimulating the development of cells types that would not otherwise emerge in either alone (as described *in vivo* e.g. in (Han et al., 2019)).

To confirm the spatial dynamics of endoderm cells, we tracked live FoxA2+ cells by imaging Gastruloids formed by aggregation of FoxA2/TBra double reporter cells (TFoxA2; T/Bra:GFP, FoxA2:tagRFP, Yang (2015)). Gastruloids made from this cell line form too a CDH1+/FOXA2+ internal primordium by 144h, analogous to that observed in SBR Gastruloids (Figure 6A and Figure 6B). Live imaging of these Gastruloids shows FoxA2+ cells initially exclusively within the posterior (TBra+) domain of the Gastruloid. These cells then gradually migrate out of this domain to populate the anterior half of the Gastruloid where they proliferate and coalesce into the final compact primordium (Figure 6C, and Supplementary Video 1). The formation of a single, compact mass of cells by 144h thus appears the result of cells clustering to each other as they move from posterior to anterior, and as they move and divide locally within the anterior domain. FACS analysis of the double-reporter Gastruloids confirms the drastic increase in FoxA2+ cells from 96h and 120h (Figure 6D).

Interestingly, the CDH1+ primordium appears to undergo epithelial maturation over time. Whereas CDH1+ cells of the t=72h Gastruloid represented more an epithelioid state, with expression of epithelial markers but without epithelial architecture, the t=120h and onward CDH1 mass shows signs of apico-basal polarity with polarised arrangement of GM130 (Figure 4B.3), and gradual deposition of discontinuous stretches of laminin (LAMA1 subunit) at the interface with the overlaying mesoderm (Figure 4B.4). We could not prove the existence of a continuous lumen within this epithelium, suggesting this structure to be more akin to a plastic epithelial mass rather than a defined continuous tube (data not shown). When present, supernumerary points of contact with the posterior surface of the Gastruloid do however seem to be consistently associated with rosetting and local invagination (see Figure 4A), even though we cannot at this point demonstrate continuity of these cavities with the rest of the CDH1 core.

### Endodermal patterning along the AP axis of the Gastruloid.

Having observed such dramatic and unexpected epithelial rearrangements over late Gastruloid development, and such tight association between this newly formed CDH1 core and the endodermal marker FOXA2 (Figure 4A and 5C), we proceeded to further characterise the identity of these cells and their possible patterning along the AP axis (Figure 4C, indeed observed for cells of the overlaying mesodermal compartment (Beccari et al., 2018; van den Brink et al., 2020)).

Matching the surprising increase in the number of CDH1+ / FOXA2+ cells from t=96h to t=120h, where



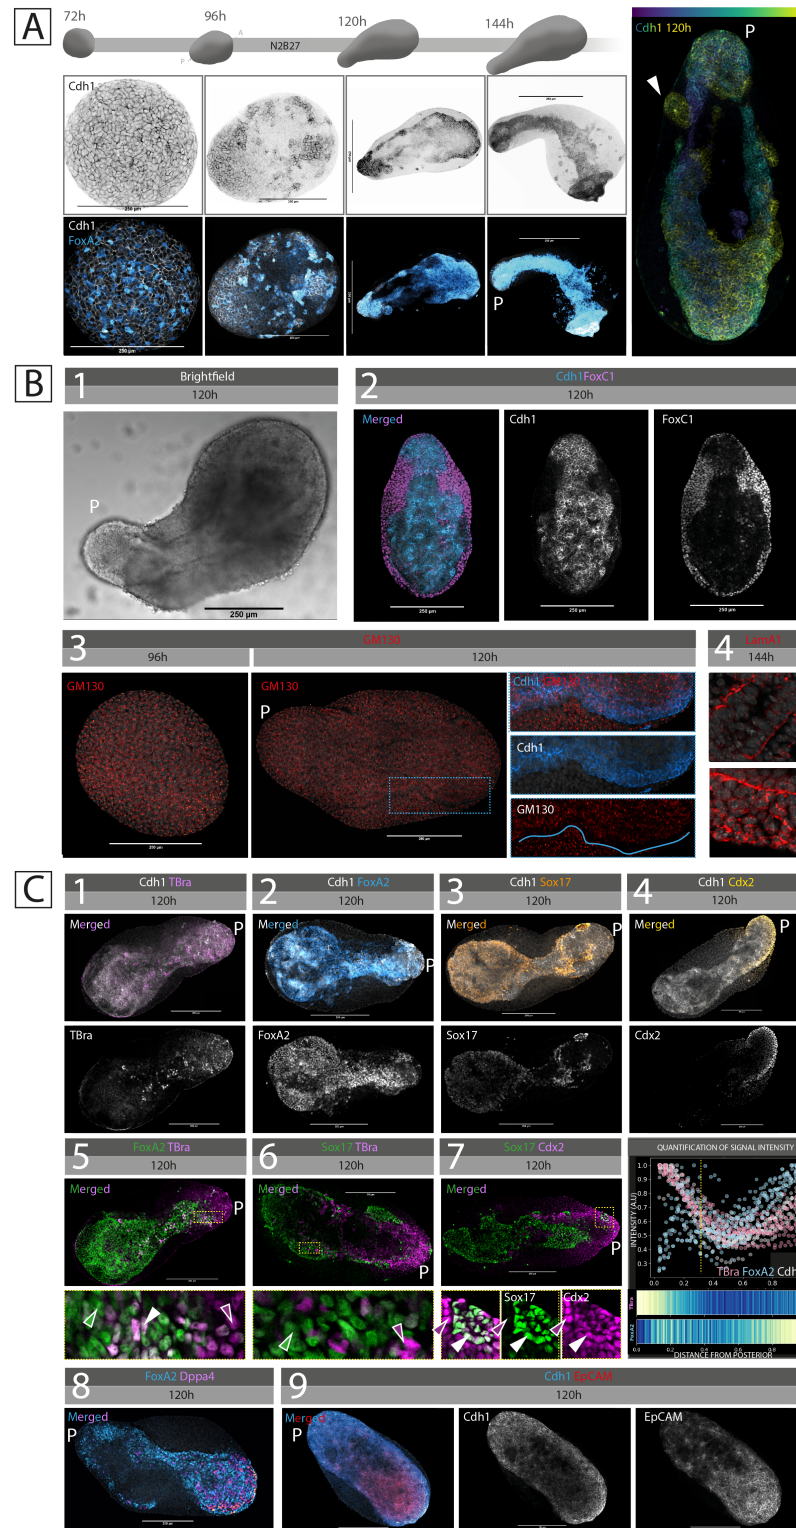

**Fig. 4. An epithelial primordium forms at the core of elongating Gastruloids, and shows patterned expression of endodermal markers.** (A) Representative immunostainings of Gastruloids undergoing elongation and morphogenesis. CDH1+/FOXA2+ cells appear to segregate at the core of the Gastruloid and form an elongated primordium spanning the entire length of the aggregate. On the right, depth-coded projection of the primordium in a 120h Gastruloid. White arrowhead highlights a posterior lateral opening to the surface. (B) Macroscopic appearance of the epithelial primordium in its relationship with the overlying mesodermal wings (FOXC1+). In the second row, maturation of the epithelial identity of the primordium is highlighted by the establishment of apico-basal polarity as hinted by GM130 segregation and basement membrane deposition (Laminin alpha 1 subunit, Lama1). (C) Immunostaining of elongated Gastruloids (120h) against the posterior markers Tbra and Cdx2, the endodermal markers FoxA2 and Sox17, the pluripotency marker DPPA4, and the epithelial marker EpCAM to see their localisation within the CDH1+ primordium. A summary expression profile of some of these markers is also provided (gray dotted line indicating the separation between the domain of high Tbra but low FoxA2, and that of high FoxA2 and low Tbra). Scale bar is always 250um. Marker colocalisation is shown in green and magenta, with double-positive cells appearing white (examples of single-positive and double-positive cells highlighted by single-colour and white arrowheads respectively). P = posterior of the Gastruloid.

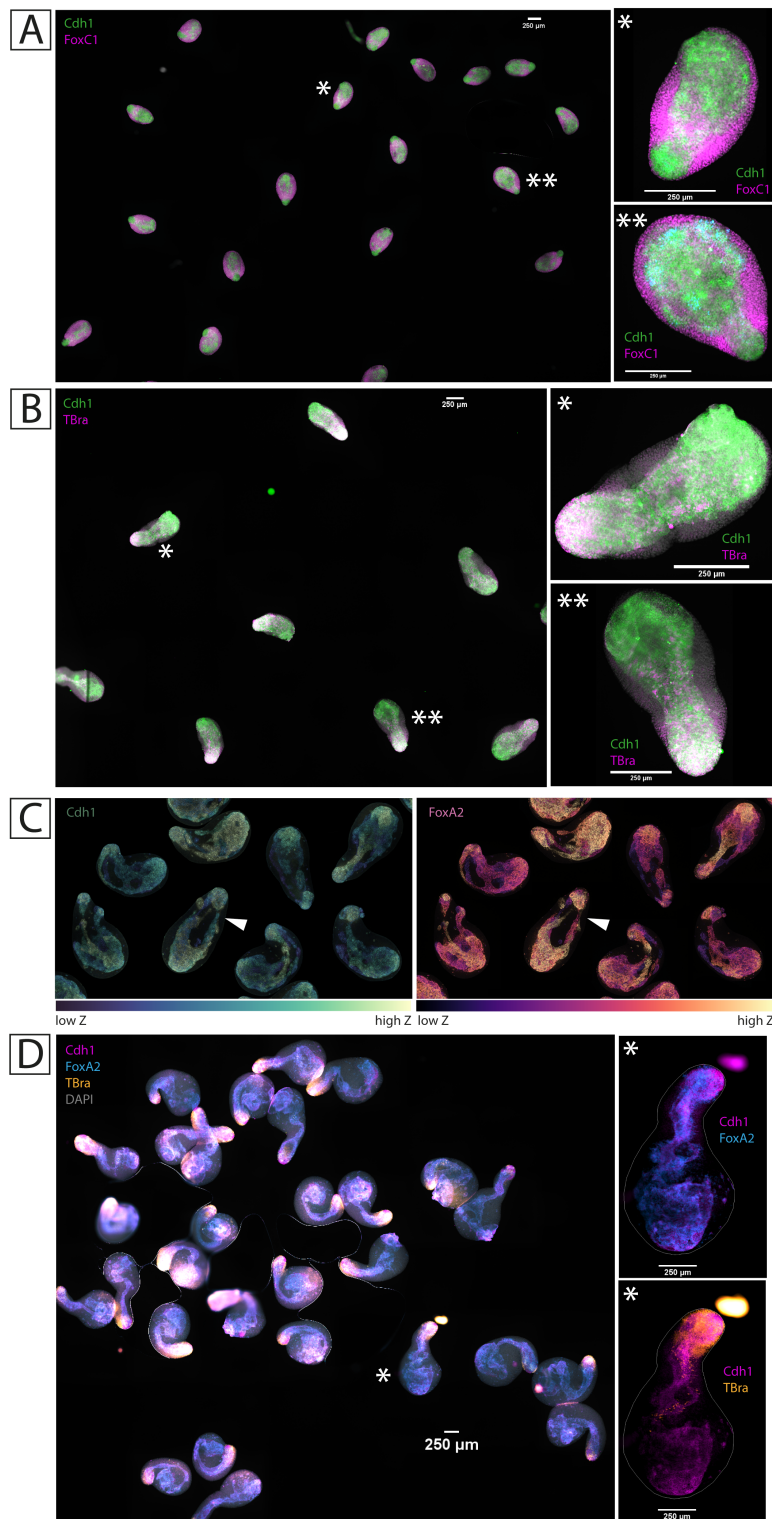

**Fig. 5. The CDH1 epithelial primordium is consistently observed in all TBra/Sox1 double reporter Gastruloids (n=97/99, N=6).** Automated scanning of an entire microscope slide of t=120h Gastruloids, immunostained against CDH1 and either (A) the pan-mesodermal marker FOXC1, or (B) the posterior epiblast and primitive streak marker TBra. Asterisks indicate samples highlighted at the right of each panel. (C) Depth-coded collection of multiple t=120h Gastruloids, immunostained for CDH1 and FOXA2. White arrowhead indicates the sample shown in Figure 4A, right panel. Gastruloids from different regions of a same slide were here digitally placed close to each other. (D) Automated scanning of an entire microscope slide of t=144h Gastruloids, immunostained against CDH1, FOXA2, TBra. The asterisk indicates the sample highlighted at the right. Scale bar is always 250μm.

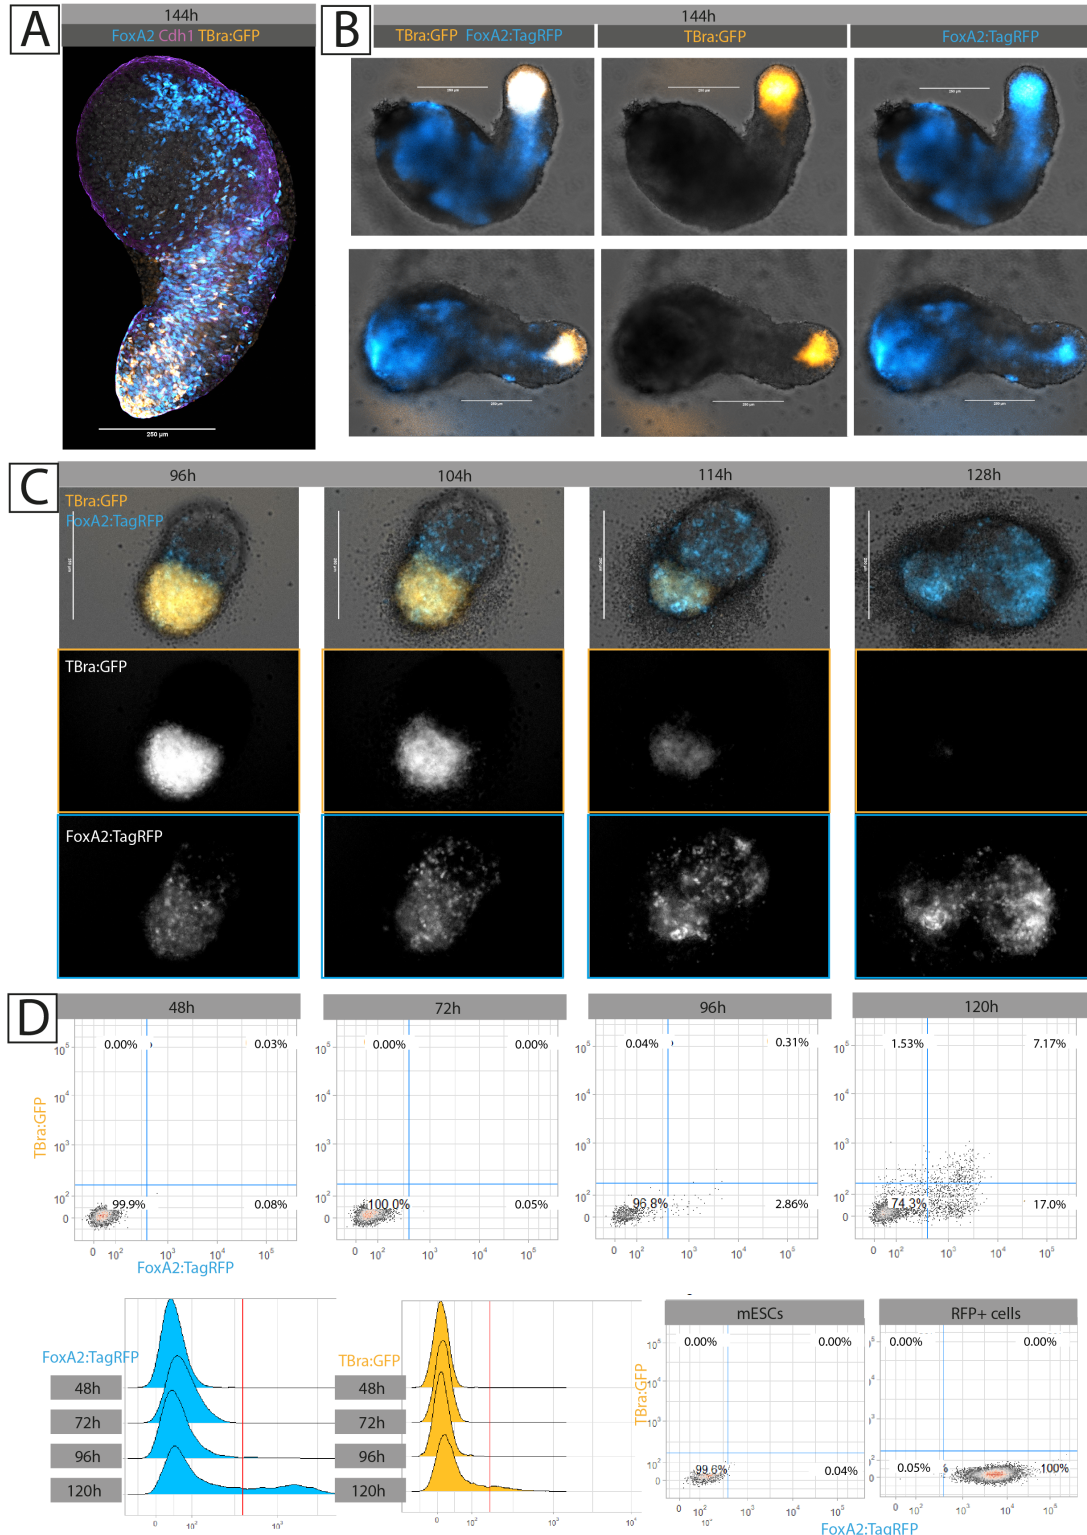

**Fig. 6. Gastruloids made from TBraGFP/FoxA2tagRFP cells highlight dynamics of endoderm primordium morphogenesis (A)**  $t=144h$  Gastruloid immunostained against FOXA2 (cyan) and CDH1 (magenta). The endogenous GFP signal (gold) shows cells positive for *TBra*. As in SBR Gastruloids, FOXA2+ cells populate a central epithelial domain. **(B)** Live imaging of reporter expression in  $t=144h$  Gastruloids shows a pattern of RFP (FoxA2, cyan) expression extending along the entire axis of the Gastruloid, consistent with what characterised in SBR Gastruloids **(C)** Still frames of a timelapse of Gastruloid development from  $t=96h$  to  $t=144h$ . RFP+ cells (FoxA2, cyan) emerge within the posterior domain of the Gastruloid (marked by TBraGFP expression, gold), populate the anterior domain, and coalesce and proliferate to form the internal rod-like primordium **(D)** FACS quantification of RFP+ cells over Gastruloid development shows a 8 fold increase between 96h and 120h. Thresholds were calibrated based on signal intensities in 2D-cultured double reporter stem cells (negative reference), and constitutively-expressing RFP+ cells (positive reference). Scale bar in all microscopy images is 250um.

602 FOXA2 seems to mark almost the entirety of the CDH1+ 659  
603 primordium, SOX17 immunostaining also reveals a sur- 660  
604 prising increase in SOX17+ numbers, with cells extending 661  
605 from the neck of the CDH1 primordium (and often from 662  
606 the "hole" like surface openings described above) up to  
607 anteriormost extremity of the epithelium (Figure 4C.2 and 663  
608 Figure 4C.3). Immunostaining for the posterior primitive 664  
609 streak and tailbud marker TBra (Figure 4C.1) reveals that 665  
610 while FOXA2+ and SOX17+ cells may well be in continuity 666  
611 with the CDH1+/TBra+ Gastruloid tip, they organise 667  
612 themselves just anterior to it. Batch quantification of signal 668  
613 intensity along the AP axis of Gastruloids (see plot in 669  
614 Figure 4C) indeed highlights reproducible patterning where 670  
615 the posterior 5th of the CDH1 primordium is marked by 671  
616 TBra+/CDH1+/FOXA2- cells, while the rest is populated 672  
617 by TBra-/CDH1+/FOXA2+ (and SOX17+) cells, an epithe- 673  
618 lialised endoderm whose continuity with the TBra+ pole 674  
619 might be explained by persistent homotypic interaction 675  
620 between different CDH1+ tissues. Of note, few TBra+ cells 676  
621 do seem to also extend deeper into the FOXA2+ domain 677  
622 (Figure 4C.5), and constitute a CDH1+/TBra+/FOXA2+ 678  
623 population that may be consistent with midline embry- 679  
624 onic structures (Burtscher & Lickert, 2009; Yamanaka 680  
625 et al., 2007) (and captured by FACS, see Figure 6D). 681

626  
627 At the very posterior of the Gastruloid (and thus of the 683  
628 CDH1 primordium), the posterior marker CDX2 (Beck 684  
629 et al., 1995) marks not only the TBra+/CDH1+ cells of the 685  
630 gastruloid tip, and CDH1- mesenchymal cells emerging 686  
631 laterally from it (Figure 4C.4), but also (CDH1+/)SOX17+ 687  
632 cells at the posterior limit of the SOX17+ domain (Figure 688  
633 4C.7). These structures have been likened to the caudal 689  
634 intestinal portal forming during *in vivo* endoderm develop- 690  
635 ment (Beccari et al., 2018). At the opposite end (anterior), 691  
636 DPPA4+ cells intermingle with FOXA2+ endoderm (Figure 692  
637 4C.8), possibly representing a surprising maintenance of 693  
638 pluripotency from the earliest timepoints of Gastruloid 694  
639 differentiation (giving their continuity with DPPA4+ cells 695  
640 at all previous timepoints). On this regard, other groups 696  
641 have interestingly reported the presence of Primordial- 697  
642 Germ-Cell-like cells, marked by DPPA3+, in association 698  
643 with the endodermal component (Veenliet et al., 2020). 699

700  
701 Finally, we identify the cell surface protein EpCAM as 701  
702 another marker of the entire primordium, with expression 702  
703 almost completely overlapping that of CDH1 (Figure 4C.9), 703  
704 yet with an apparent enrichment towards the anterior. The 704  
705 expression of EpCAM distinguishes the (CDH1+/)SOX17+ 705  
706 cells we observe as being indeed endodermal, given that 706  
707 this same marker also characterises endothelial progenitors 707  
708 (which would however be EpCAM-) at around the same 708  
709 developmental timepoints (Choi et al., 2012). Interestingly, 709  
710 EpCAM staining appears enriched in the region of the 710  
711 CDH1 primordium occupied by SOX17+ cells, hinting 711  
712 that combinations of cell-surface markers might drive 712  
713 further sub-sorting of different epithelial combinations 713  
714 within this same CDH1+ core. Here, the posterior of the 714  
715

primordium would represent a "posterior epiblast"-like, CDH1+/EpCAMlow/TBra+ domain; and the anterior a CDH1+/EpCAMhigh/FOXA2+/Sox17+ "endoderm"-like domain.

**Gastruloid endoderm contains patterned anterior and posterior endodermal types.** To better characterise the cell identities represented within the Gastruloid endoderm primordium, beyond immunostainings for classical markers, we made use of a recently released single-cell RNA sequencing dataset of SBR Gastruloids spanning timepoints t=96h to t=168h (Rossi et al., 2019). Analysis of the dataset highlights two clusters characterised by the expression of *FoxA2*, *Sox17*, *Cdh1*, and *EpCAM*, and lower numbers of cells also expressing *TBra* and *Eomes* (see Figure 7A, lower), and as such interpreted as to represent endoderm. Cells of one of such clusters are marked by the expression of genes such as *Otx2*, *Sox17*, *Hhex*, *Gata6*, *Gsc* (cluster 13 in Figure 7A, light yellow), and were here labelled as "early endoderm" given that these cells present a signature of anterior mesendoderm and definitive endoderm (Costello et al., 2015; Thomas et al., 1998). The second cluster was instead demarcated by the expression of genes such as *Cldn4,6,7*, *Krt7*, *Crb3* (cluster 4 in Figure 7A, beige) and was here labelled as "mature endoderm", given the strong expression of epithelial markers shown to characterise later (rather than early) stages of endoderm maturation *in vivo* (i.e. gut tube; Anderson et al. (2008); Ogaki et al. (2011)). Indeed, performing differential expression analysis between the two clusters (Figure 7A, side-by-side grid) reveals that the "early endoderm" can be distinguished by higher expression of genes such as *Sfrp1*, *Lhx1*, *Hesx1*, *Fgf5* (consistent with an anterior endoderm/mesendoderm character; Costello et al. (2015); Finley et al. (2003); Khoa et al. (2016)), while "mature endoderm" distinctively expresses higher levels of e.g. *Igfbp5* and *Frem2* (expressed in the gut tube, Green et al. (1994); Timmer et al. (2005)), as well as additional epithelial markers such as *Krt19* and *Cldn4,9*. Adding a third dimension to the UMAP embedding representation (3D UMAP, Figure 7B) reveals that the two "endoderm" clusters reside in closest proximity to the cells annotated as anterior mesoderm (cluster 3; markers: *Gata6*, *Hand2*, *Myl7*, *Gata4*, *Lhfp*; in continuity with the "early endoderm" cluster 13), and ectoderm (cluster 5; markers: *Gjb3*, *Epcam*, *Tfap2c*, *Cdh1*, *Krt18*; in continuity with the "mature endoderm" cluster 4), but also with those annotated as notochord/axial mesoderm (cluster 1; markers: *TBra*, *Cobl*, *Shh*, *Cdx2*, *Noto*; also closest to the "mature endoderm" cluster 4). A list of all markers is available in as a Supplementary Table. Supporting the early/mature labelling of each cluster, the "early endoderm" cluster preferentially contains cells of Gastruloids from earlier timepoints (96h-144h), while the "mature endoderm" preferentially contains cells from later timepoints (120h-168h, Figure 7C). Notably, the "mature endoderm" cluster expresses all markers recovered by immunostaining (see previous figures and Figure 7A, lower panels), and many markers associated with foregut and anterior foregut (e.g. *Nkx2.3*, *Isl1*, *Otx2*; Biben et al. (2004); Nowotschin et al. (2019b); Zhuang et al. (2013)) (Figure 7D). Still, markers

716 identifying all positions along the AP axis of the embryonic 773  
717 gut tube (Nowotschin et al., 2019b) could be recovered within 774  
718 Gastruloid endoderm clusters (Figure 7D and Figure S1). 775

719 To better resolve the extent to which gut tube endoderm 776  
720 identities are represented amongst Gastruloid endoderm, 777  
721 we referred to published single-cell RNAseq data of the 778  
722 mouse embryonic gut tube (Nowotschin et al., 2019b). The 779  
723 questions arises on whether endoderm cells making up the 780  
724 central core of the Gastruloids represent the entirety of 781  
725 the embryonic gut tube or only a subset of it (e.g. only 782  
726 posterior endoderm), and whether the absent contribution of 783  
727 extraembryonic endoderm cells in the Gastruloid generation 784  
728 process may bias such identities to specific domains. More 785  
729 generally, we were interested in resolving the type of 786  
730 endoderm generated by self-organisation within Gastruloids. 787  
731 As in the original publication (Nowotschin et al., 2019b), the 788  
732 UMAP representation of embryonic endoderm cells (shown 789  
733 in Figure 8A and throughout) can act as an approximate 790  
734 visual map of the gut tube as it extends from anterior foregut 791  
735 (leftmost in Figure 8A) to posterior hindgut (up-right in 792  
736 Figure 8A). Accordingly, plotting known markers of anterior 793  
737 (e.g. *Nkx2.5*, *Sox2*; Nowotschin et al. (2019b); Wei & Condie 794  
738 (2011); Wood & Episkopou (1999); Zhang et al. (2005)) 795  
739 and posterior gut (e.g. *Cdx2*, *TBra*; Beck et al. (1995); 796  
740 Kispert & Herrmann (1994)) marks corresponding left and 797  
741 right regions in the UMAP (Figure 8A), and indeed plotting 798  
742 all 20 Transcription Factors identified by Nowotschin 799  
743 et al. (2019b) as marking increasingly posterior regions 800  
744 of the gut tube marks increasingly rightmost domains of 801  
745 the UMAP in our reprocessed dataset too (see Figure S1). 802

746 804  
747 Leveraging the availability of this embryonic dataset, 805  
748 we integrated Gastruloid endoderm clusters (*in vitro* cells) 806  
749 and gut tube embryonic clusters (*in vivo* reference cells) 807  
750 with batch correction, to see how Gastruloid endoderm cells 808  
751 would distribute across the shared low dimensionality em- 809  
752 bedding (Tan et al., 2021). As shown and quantified in Figure 808  
753 8B, cells from both Gastruloid endoderm clusters ("early", 809  
754 cluster 13 in light blue, and "mature", cluster 4 in red) span 810  
755 the entire length of the embryonic domain (light gray), with 811  
756 "early endoderm" cells showing a clear preferential accumu- 812  
757 lation within areas covered by cells of the posterior gut. The 813  
758 relative representation of "early" and "mature" Gastruloid 814  
759 endoderm cells within each region of the UMAP (Figure 815  
760 8B, barplot) shows that i) "mature endoderm" cells from the 816  
761 Gastruloids span the entire length of the UMAP, and ii) they 817  
762 are the major Gastruloid-endoderm type falling within left- 818  
763 most clusters (Figure 8C, clusters 9, 10, 11). These clusters, 819  
764 within the gut tube dataset, would be annotated as anterior 820  
765 foregut types, progenitors of the thyroid, thymus, and lungs 821  
766 (Figure 8C, leftmost). Gastruloid-"mature endoderm" cells 822  
767 also fall within the embryonic Posterior Hindgut cluster 823  
768 (cluster 2) and, in equal proportions with "early endoderm" 824  
769 cells, within the cluster that would be annotated as Small 825  
770 Intestine (cluster 0, Figure 8C, middle). "Early endoderm" 826  
771 Gastruloid cells seem instead to over-represent Posterior 827  
772 Foregut/Midgut identities (Liver, Pancreas; clusters 4 and 5, 828

Figure 8C, right). In summary, it appears that the endoderm 829  
identities emerging and self-organising within Gastruloids 830  
to form the core FOXA2+ epithelial domain observed by 831  
immunostaining mature endoderm identities corresponding 832  
to the entire length of the embryonic gut tube, albeit with 833  
low representation of midgut (stomach, pancreas, liver) cells. 834  
Notably, Gastruloid-endoderm matures a strong anterior 835  
foregut character (corresponding to the pharyngeal pouch 836  
endoderm *in vivo*), a finding most recently echoed in gas- 837  
truloids obtained from zebrafish cells (Cheng et al. (2021), 838  
where the only endoderm found was pharyngeal endoderm). 839

840 Finally, we verified whether the expression of the markers 841  
identified in the single-cell dataset was correctly patterned 842  
along the AP axis of the Gastruloid. That is, whether the 843  
variety of cell identities uncovered in the single cell dataset 844  
are intermingled throughout the core of the Gastruloid, or 845  
they are rather spatially segregated at the correct position 846  
along the AP axis of the Gastruloid as is the case for 847  
their *in vivo* embryonic counterparts along the gut tube. 848  
Immunostainings for markers such as TBra and Cdx2 849  
indeed shows positive cells to be restricted to the posterior 850  
end of the endoderm primordium (refer back to Figure 851  
4C and Figure 5D). To test whether markers of anterior 852  
endoderm populations similarly localise to the anterior of the 853  
primordium, we performed Hybridisation Chain Reaction 854  
(HCR) against the foregut marker Pax9 (Figure 8D). Indeed, 855  
*Pax9* is known to be expressed within the pharyngeal foregut 856  
endoderm (Peters et al., 1998) and is highly expressed in 857  
the Gastruloid-"mature endoderm" cluster (Figure 8D). For 858  
this foregut marker too, expression is consistently restricted 859  
to the anteriormost extremity of the endoderm primordium. 860  
It thus appears that both posterior and anterior markers can 861  
be recovered at their expected position within the endoderm 862  
primordium of late Gastruloids. 863

## 864 Discussion

865 Cells expressing endodermal markers, and gene expression 866  
patterns consistent with endodermal identities, have been 867  
described in several previous and current Gastruloid studies 868  
(Anlaş et al., 2021; Beccari et al., 2018; Olmsted & Paluh, 869  
2021; Pour et al., 2019; Turner et al., 2017; van den Brink 870  
et al., 2020, 2014; Veenvliet et al., 2020). These descriptions 871  
have however often not taken centre stage (with the excep- 872  
tion of (Pour et al., 2019), see later). Of notice is the fact 873  
that FoxA2 and Sox17, indeed classical endoderm markers, 874  
are also expressed in other embryonic cell types at the same 875  
developmental stages where the endoderm and the gut tube 876  
are specified. As such, while detecting either of these mark- 877  
ers in the embryo may exclude non-endodermal identities 878  
given the spatial and temporal context of the observation, 879  
the same cannot be said in Gastruloids, where the full extent 880  
of the cell types generated is still under characterisation 881  
(van den Brink et al., 2020), and where temporal alignment 882  
with *in vivo* developmental stages is uncertain (Beccari et al., 883  
2018). Accordingly, FOXA2 marks the endoderm just as 884  
much as the neural floorplate and the notochord; TBra marks 885

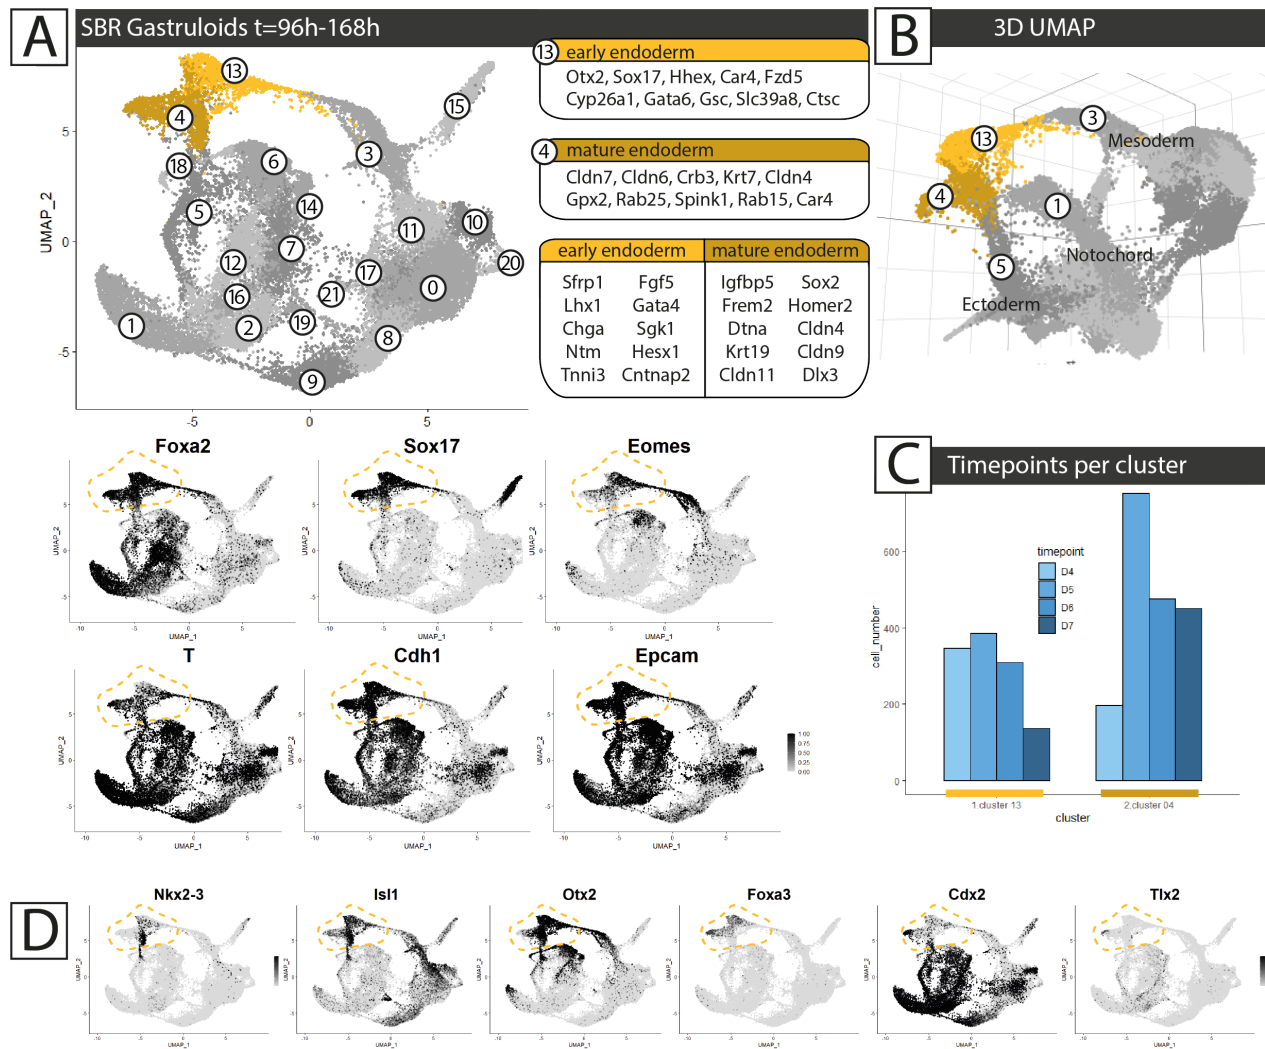

**Fig. 7. Analysis of single-cell RNAseq datasets from SBR Gastruloids highlights two "endoderm" clusters** (A) **Top:** UMAP representation of the dataset from [Rossi et al. \(2019\)](#). The two clusters attributed as "early endoderm" (13) and "mature endoderm" (4) are highlighted in gold and beige respectively. The top 10 marker genes for each cluster are indicated, as well as the top 10 differentially expressed genes distinguishing one from the other. **Bottom:** Expression of classic endoderm markers (black). (B) 3D UMAP of the same dataset as in A. Clusters in proximity to the endoderm cluster are numbered, along with their annotation. Notice how cluster 1 appears distant in the 2D UMAP. (C) Distribution of cells from Gastruloids from each timepoint (Day4 to Day7, D4 to D7, i.e. 96h to 168h) across the two "endoderm" clusters. (D) Expression of anterior and posterior (left to right) gut tube markers (see [Nowotschin et al. \(2019b\)](#)) within the gastruloid dataset. "Endoderm" clusters are circled in gold throughout.

829 posterior hindgut as well as posterior epiblast, notochord, 845  
 830 and neuromesodermal progenitors; and SOX17 marks both 846  
 831 endoderm and endothelial progenitors ([Choi et al., 2012](#)). 847  
 832 848  
 833 Regardless, original descriptions of Gastruloids were indeed 849  
 834 already describing polarised emergence of endodermal cells 850  
 835 expressing both FOXA2 and SOX17 ([van den Brink et al., 2014](#)). A compact FOXA2+ domain was thus seen to cluster 852  
 836 at the posterior of late stage Gastruloids, with SOX17+/TBra- 853  
 837 cells occupying this very FOXA2+ domain and internalising 854  
 838 within epithelial vesicles. We presently cannot reconcile this 855  
 839 posteriormost pattern of expression with what we describe 856  
 840 here, but we do notice that in those cell lines where the 857  
 841 CDH1 primordium does not extend throughout the length of 858  
 842 the aggregate it segregates as a compact mass at the posterior 859  
 843 (data not shown, but see FGF4-treated deficient Gastruloids 860  
 844 in [Gharibi et al. \(2020\)](#)). The described invagination of CDH1+/SOX17+ cells may however indeed explain the surface continuity of the posterior CDH1 primordium that we see in the neck region of some of our Gastruloids. Even more complete Sox17 patterns have been further described in ([Turner et al., 2017](#)), where the use of a reporter highlights the formation of Sox17+ midline, tubular-shaped patterns in elongating gastruloids. The study likens these cells to ventral endodermal cells of the E8.5 mouse embryo. Based on our result, and the extensive SOX17 positivity of the CDH1 primordium we describe here, we would expect the reporter line used in ([Turner et al., 2017](#)) to equally give rise to an internal endodermal primordium. Interestingly what we here infer by immunostaining seem to be consistent with the early Sox17

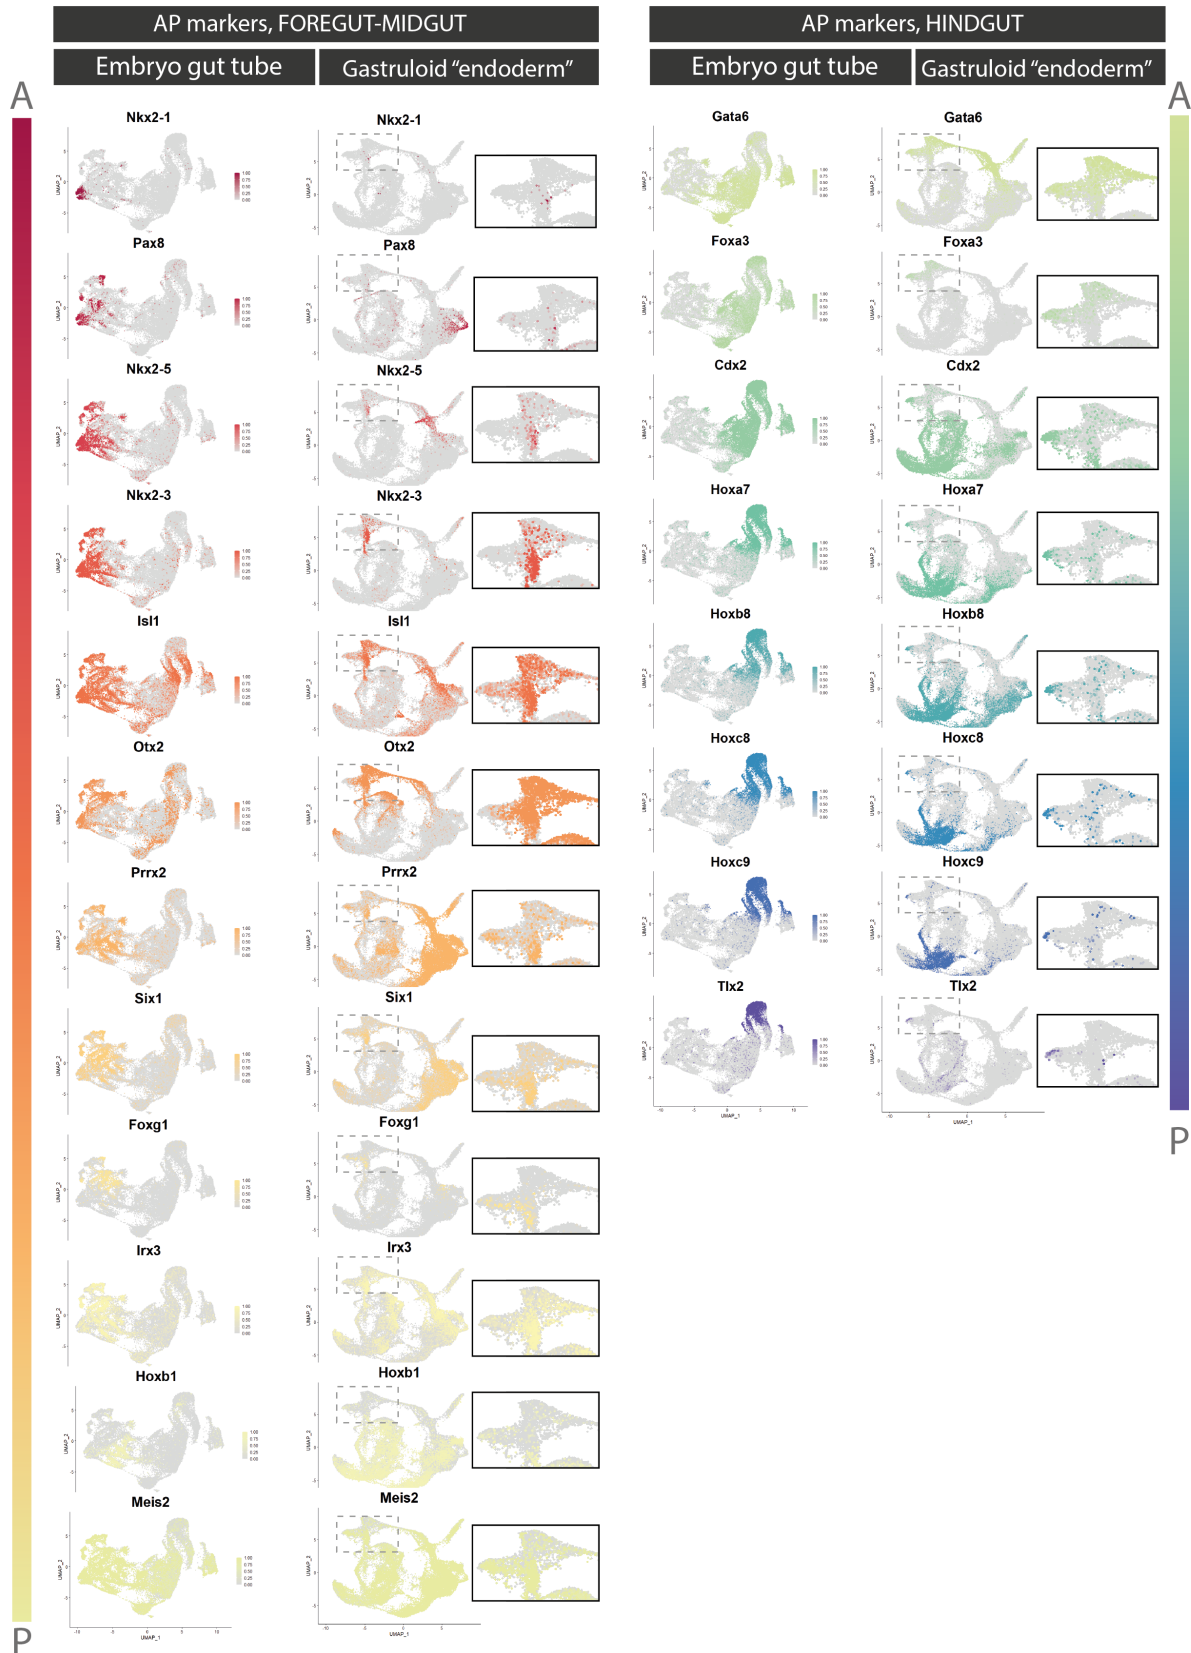

**Fig. S1. Expression pattern of gut endoderm Anterior-Posterior markers in *in vivo* and *in vitro* datasets** Markers of AP position along the embryonic gut tube (Nowotschin et al., 2019b) are plotted from anteriormost foregut (top, *Nkx2-1*), to posteriormost hindgut (bottom, *Tlx2*). For each gene, the expression pattern is shown for both the embryonic dataset (E8.75 gut tube, Nowotschin et al. (2019b); left) and the Gastruloid dataset (SBR Gastruloids, Rossi et al. (2019), right). Validating the reprocessing of the embryonic dataset, increasingly posterior markers define continuous domains from one extremity of the UMAP to the other. For the Gastruloid dataset, a inset focusing on the two "endoderm" clusters is also provided. A = Anterior, P = Posterior.

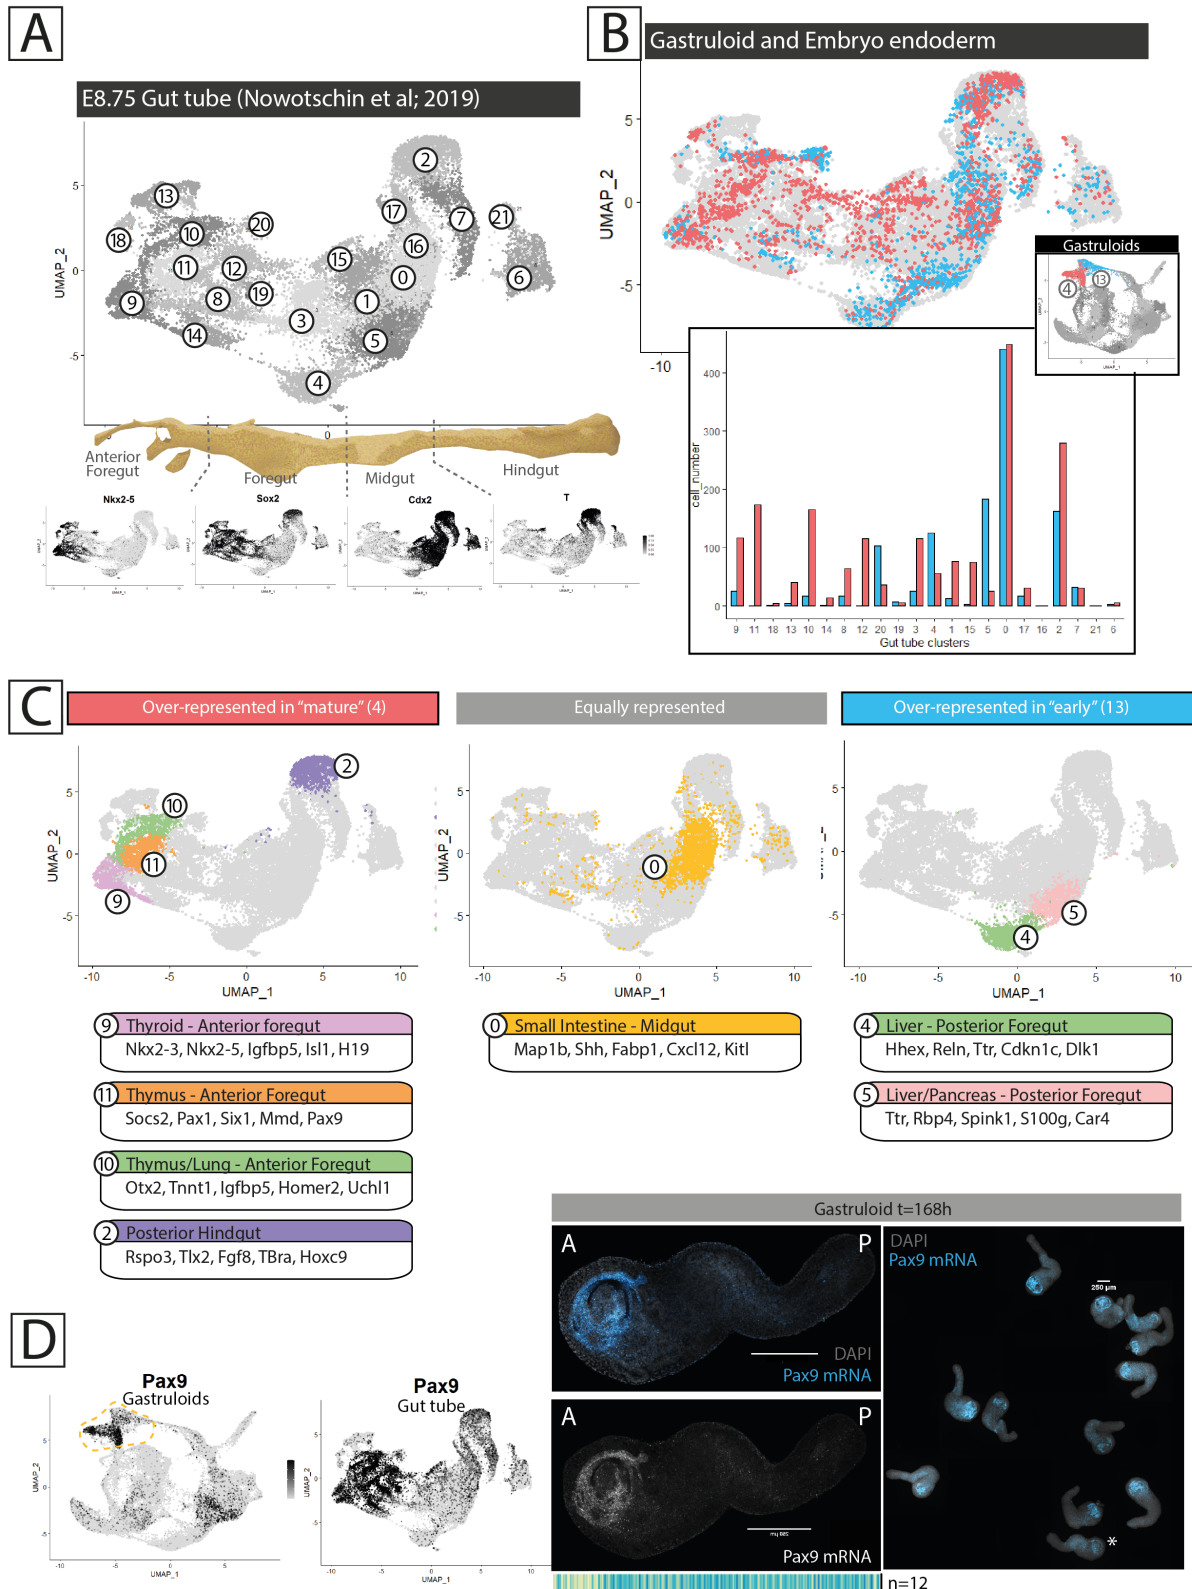

**Fig. 8. Gastruloid "mature endoderm" aligns with identities across the entire length of the embryonic gut tube, including Anterior Foregut.** (A) UMAP of the reprocessed embryonic gut tube dataset from Nowotschin et al. (2019b). The expression domains of known anterior and posterior gut markers orients the map with anterior foregut at the left, and posterior hindgut at the right. (B) **Top:** Integration with batch correction of Gastruloid-endoderm clusters (4 and 13, red and blue respectively, see inset) and the embryonic gut tube reference (light gray). **Bottom:** barplot quantifying the number of cells from each gastruloid-endoderm cluster falling within each embryonic gut tube cluster (ordered from anteriormost to posteriormost left to right along the x-axis). (C) Highlight of the embryonic clusters populated majoritarily by Gastruloid-"mature endoderm" cells (left), "early endoderm" (right), or both (middle). The top 5 marker genes for each of these clusters is indicated, as well as their annotation. (D) Expression pattern of the Anterior Foregut marker *Pax9*, and corresponding Hybridisation Chain Reaction against *Pax9* mRNA in t=168h Gastruloids. Asterisk indicates the Gastruloid shown in the magnification. Scale bar is 250um throughout.



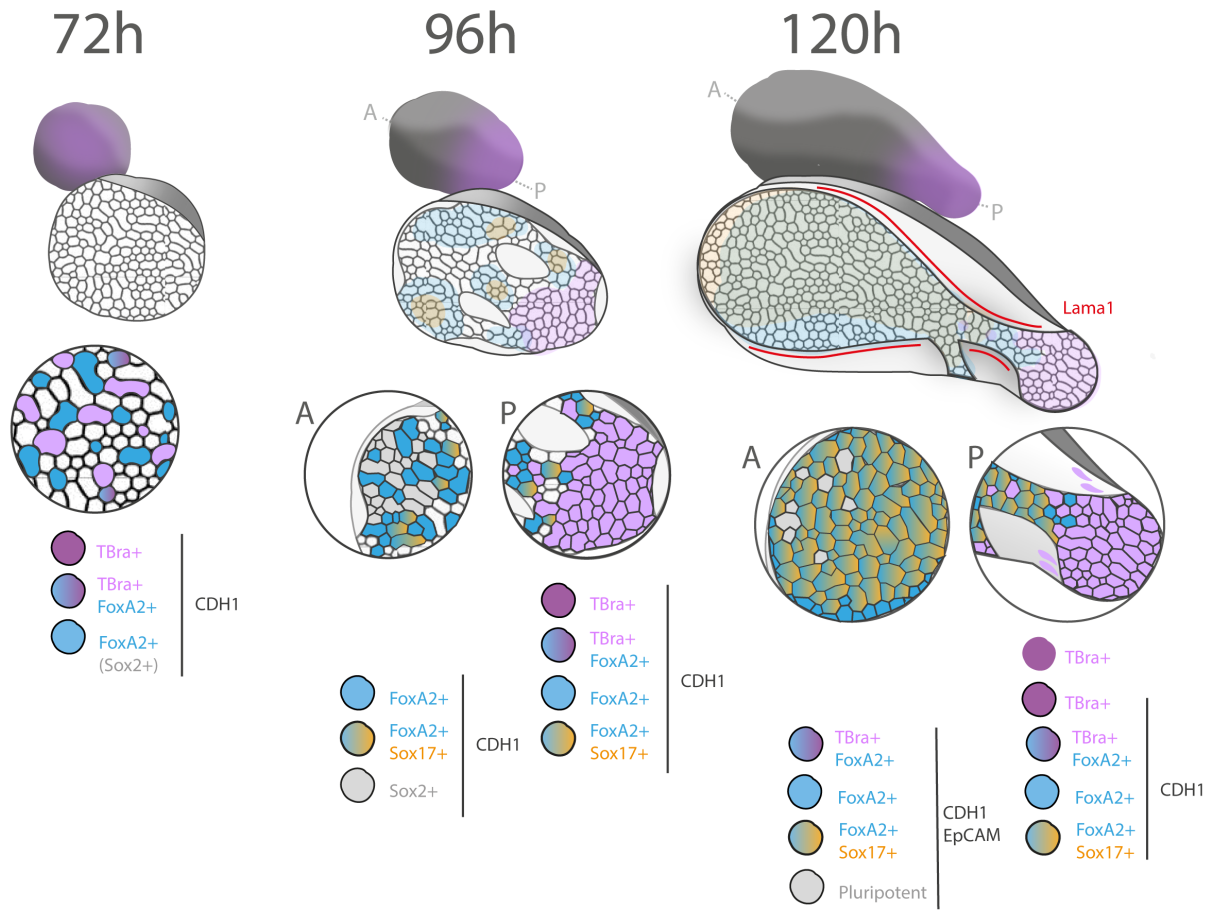

**Fig. 9. Endoderm specification and patterning in Gastruloids, a summary.** At 72h of development, Gastruloids appear to be an epithelioid spheroid with intermingled TBra+ and FOXA2+ CDH1+ cells. We interpret FOXA2+ cells to also be SOX2+, and this spheroid to represent the posterior epiblast of the early gastrulating mouse embryo, with equally intermingled populations. Between 72h and 96h, Gastruloids undergo widespread Snai1-dependent EMT: mesenchymal types emerge and CDH1 continuity fragments. At the posterior, CDH1+/TBra+ cells define a proximal posterior epiblast compartment and FOXA2+ cells define a distal posterior epiblast region. Anteriorly, the CDH1 domain remains SOX2+. Within the CDH1+/FOXA2+ domains, SOX17+ cells emerge. In the embryo these cells would be expected to be found in the mesenchymal compartment. At t=120h, the CDH1+ primordium organises as a maturing epithelium extending along the entire length of the aggregate, enveloped by mesenchymal (mesoderm) cells. FOXA2+ and SOX17+ cells pattern along this primordium, just anteriorly to a posterior-epiblast-like TBra+/CDH1+ domain. EpCAM also seems to mark this very CDH1 primordium, with an anterior enrichment.

861 dynamics described in the paper: Sox17+ cells emerg- 880  
 862 ing towards the anterior pole of the early Gastruloid and 881  
 863 then expanding to occupy a relatively more posterior domain. 882  
 864 883  
 865 SOX17+ cells were also identified in (Beccari et al., 884  
 866 2018), and described as forming tubular structures based on 885  
 867 DAPI counterstaining. More importantly, the publication de- 886  
 868 scribes gene expression dynamics associated with advanced 887  
 869 endoderm maturation: the early upregulation of markers such 888  
 870 as Gsc and Cdx2, upregulation of Cer1 during elongation 889  
 871 (and which indeed appear in the "early endoderm" cluster 890  
 872 discussed here), and expression of gut endoderm markers 891  
 873 during later development (Nedd9, Sorcs2, Pax9, Pyy, Shh, 892  
 874 Krt18). *In situ* hybridisation patterns for some of these 893  
 875 markers are again consistent with the presence of an internal 894  
 876 endodermal structure. Still, detailed spatial characterisation 895  
 877 is lacking, and the Gastruloid remains framed as a mainly 896  
 878 mesenchymal neuromesodermal aggregate. Validation of the 897  
 879 maturation of endodermal identities can also be found in 898

the single-cell transcriptomics data generated by (van den Brink et al., 2020), which detect a cluster of cells postulated to represent definitive endoderm as expressing markers Epcam, Col4a1, Sox17. All of these markers are indeed recovered within the endoderm clusters considered here.

Most recently, tubular structures populated by FOXA2+ and some SOX17+ and TBra+ cells have also been described in (Veenliet et al., 2020). Associated with such endoderm-like compartment, the authors also observe Primordial-Germ-Cells (DPPA3+ cells) which indeed migrate along the gut tube during *in vivo* development. Our results would seem to suggest that embedding of the Gastruloid in extracellular matrix components (Veenliet et al., 2020) is however not necessary to observe endoderm morphogenesis, and that this tissue may actually already organise its own extracellular matrix environment. Unlike mesoderm thus, which seems to require *in vitro* ECM cues for productive mesenchymal to epithelial transition (van den Brink et al.,

2020; Veenliet et al., 2020), morphogenesis of the endo-  
derm appears to be intrinsic to the tissue. Accordingly,  
Olmsted & Paluh (2021) recently reported the formation of  
an analogous epithelial central tube in human gastruloids  
under shaking culture (i.e. without embedding). This  
so-called "primitive gut tube" expresses classic endodermal  
markers (*FoxA2*, *Sox17*, *Gata6*, *Sox2*, *Cdh1*, and *Epcam*),  
as well as markers of more specialised cell types such as  
*Lgr5*, *Nkx2.1*, *Lyz*, and *Vill* over 16 days of culture. It is  
not stated whether these markers are patterned along the tube.

The earliest steps of endoderm emergence in Gastru-  
loids have been attentively detailed by (Pour et al., 2019),  
who elegantly used a TBra/Sox17 double reporter cell line  
to document expression of these two markers in a temporal  
sequence consistent with what we describe in this study.  
*Sox17*+ cells emerge around 1 day after CHIR exposure,  
intermingled within a field of TBra+ cells. While the authors  
also see strong association between *Sox17* expression and  
epitheliality (CDH1 positivity), they do seem to identify a  
stage where such *Sox17*+ cells are CDH1-, and indeed favour  
an interpretation that supports a mesendodermal origin of  
endodermal precursors. In our observations, Gastruloids start  
in a epithelioid configuration where cells have mesenchymal  
character but express CDH1, and in which TBra+, FOXA2+,  
and SOX17+ cells thus all emerge in a CDH1+ context. Early  
endoderm dynamics have since also been reported in Anlaç  
et al. (2021), which used HCR to show early anterior segrega-  
tion of *Foxa2*+ cells in steps and relative timings consistent  
with what shown here by immunostaining and live imaging.

The observations we report here bring centre stage the  
question of the epithelial character of endodermal pre-  
cursors, and its link to the fate (both in terms of identity  
and of location) of these cells (Ferrer-Vaquero et al., 2010;  
Nowotschin et al., 2019a; Viotti et al., 2014). We expand  
on previous Gastruloid studies by taking into consideration  
multiple markers of endodermal identity and documenting  
their dynamics in relation to one another, and notably by  
also tracking these cells over time as they undergo morpho-  
genesis. We further also describe sorting of these cells into  
a complex primordium with maturing epithelial architecture  
and coarsely patterned domains of gene expression along the  
AP axis of the organoid. By transcriptional comparison with  
relevant embryonic datasets (Nowotschin et al., 2019b), we  
highlight the emergence of cell identities corresponding to  
the entire length of the gut tube, with notable representation  
of anterior foregut, midgut, and posterior hindgut types, and  
show these to be patterned along the AP axis of the system.

At this point, our observations are consistent with a  
model whereby SOX17+ cells never leave their epithelial  
environment (initially, the "epiblast"-like domain) and do  
not need to transition through a mesenchymal state, at least  
not through classic Snail-mediated EMT. We speculate  
that, if SOX17+ endodermal cells are not being directly  
specified within the FOXA2+ epiblast, the SOX17+ cells

that we incongruously see in this compartment are a result of  
these cells sticking to neighbours with the same epithelioid  
character. While in the embryo the isotropic relocalisation of  
CDH1 associated with egressed endodermal cells might be  
compatible with segregation from both epiblast (columnar  
epithelium) and visceral endoderm (squamous epithelium),  
and indeed reintegration of Sox17+ cells requires  
re-polarisation, the situation is different in Gastruloids. In  
our system, FOXA2+ and SOX17+ cells are emerging not  
in a polarised columnar epithelium, but in a context that  
already displays isotropic CDH1 localisation, such that  
these cells may remain stuck in their original compartment  
just by virtue of homotypic interactions. Interestingly, and  
during preparation of this manuscript, the use of a Cdh1 live  
reporter by (Hashmi et al., 2020) has shown fragmentation  
and early sorting dynamics consistent with what we show  
here by immunostaining, and the authors explain these  
sorting dynamics by differences in interfacial tension across  
cell types. Later in development we here further observe  
an expansion of the endodermal population and its internal-  
isation within the core of the Gastruloid as the surface of  
the aggregate start being populated by an increasing number  
of mesodermal cells. Interestingly, the relative position of  
different epithelial populations may here again be explained  
by the expression of different combinations of cell-surface  
adhesion molecules, a common sorting mechanisms (Toda  
et al., 2018) that sees here some support from the bi-  
ased EpCAM distribution within our CDH1 primordium,  
enriched in the domains occupied by endodermal cells.

Our identification of a maturing epithelial structure  
throughout late Gastruloid development, contrasting with  
the overlaying mesenchymal mesodermal tissues enveloping  
it, reframes expectations regarding the extent to which fate  
and morphogenesis can spontaneously arise *in vitro*. While  
gastruloids have traditionally been pictured as aggregates  
of fates without corresponding organisation, we start to see  
increasing examples where such missing morphogenesis  
does occur. As already shown by (Bérenger-Currias et al.,  
2020; van den Brink et al., 2020; Veenliet et al., 2020) this  
can be transformatively brought about by the addition of  
diluted ECM components or extraembryonic cell types. We  
here show that differences in epithelial identities between  
emerging cell types may already be sufficient to generate  
simple architectures, and that complex epithelia may spon-  
taneously organise *de novo* in Gastruloids. Still, the extent  
to which the elaborate morphogenesis seen here is cell-line  
specific remains to be defined. Current literature contains  
examples of Gastruloids from a variety of cell lines and  
mouse backgrounds that do indeed originate such internal  
epithelial primordia (Beccari et al., 2018; Rossi et al., 2019)  
(or where we infer such primordium to be what described  
(Gharibi et al., 2020; Turner et al., 2017; Veenliet et al.,  
2020)), as well as of Gastruloids where such structures do not  
seem to appear (van den Brink et al., 2020, 2014) and where  
CDH1+ endodermal tissue segregates to the posteriormost  
tip of the aggregates instead. We favour the hypothesis that

1013 these differences likely correlate to intrinsic cell-line biases<sup>1069</sup>  
1014 in core signalling pathways, and/or on the very degree of<sup>1070</sup>  
1015 epitheliality maintained by these cells by the time they are<sup>1071</sup>  
1016 exposed to CHIR (in turn possibly relating to differences<sup>1072</sup>  
1017 in the 2D culture conditions of these cells). A systematic<sup>1073</sup>  
1018 assessment of the cell-line specific differences in these key<sup>1074</sup>  
1019 parameters remains to be performed, yet this hypothesis<sup>1075</sup>  
1020 seems to be supported by the fact that pretreatment with dif-<sup>1076</sup>  
1021 ferent signalling factors can allow/prevent formation of the<sup>1077</sup>  
1022 primordium as shown in Gharibi et al. (2020). As is the case<sup>1078</sup>  
1023 with the cell line used in this study (Figure 5), we nonethe-<sup>1079</sup>  
1024 less expect all Gastruloids generated from a given cell line<sup>1080</sup>  
1025 to consistently produce the same endoderm phenotype in all<sup>1081</sup>  
1026 Gastruloids generated. Regardless, the stratified nature of<sup>1082</sup>  
1027 endodermal and mesodermal tissues we here observe is at<sup>1083</sup>  
1028 least broadly comparable to the configuration of endoderm<sup>1084</sup>  
1029 and mesoderm in the embryo, and it is interesting to specu-<sup>1085</sup>  
1030 late that this interfacing may favour the development of more<sup>1086</sup>  
1031 advanced cell fates by reciprocal signalling interactions, as<sup>1087</sup>  
1032 *in vivo* (Bardot & Hadjantonakis, 2020; Han et al., 2019).<sup>1088</sup>  
1033  
1034 As per the classical paradigm offered by *in vitro* devel-<sup>1090</sup>  
1035 opmental models (Shahbazi & Zernicka-Goetz, 2018), we<sup>1091</sup>  
1036 believe that the extent to which Gastruloid endoderm devel-<sup>1092</sup>  
1037 opment matches *in vivo* gut tube development will highlight<sup>1093</sup>  
1038 important developmental principles in both systems. For<sup>1094</sup>  
1039 now, our observations at early stages of Gastruloids devel-<sup>1095</sup>  
1040 opment support the existence of endodermal progenitors<sup>1096</sup>  
1041 that do not transition through a TBra+ state and that do not<sup>1097</sup>  
1042 necessarily undergo classic EMT, something debated in the<sup>1098</sup>  
1043 field and for which there is not yet conclusive evidence for<sup>1099</sup>  
1044 in the mouse embryo, but consistent with what seen in other<sup>1100</sup>  
1045 embryonic models (Nowotschin et al., 2019a). Regarding<sup>1101</sup>  
1046 the abnormal epiblast-retention of endodermal cells in<sup>1102</sup>  
1047 Gastruloids, which we explain by the incongruous absence<sup>1103</sup>  
1048 of a starting epithelial architecture in the system, we wonder<sup>1104</sup>  
1049 whether a similar conjuncture would be seen in mutant<sup>1105</sup>  
1050 embryos in which the epiblast does not maintain apico-basal<sup>1106</sup>  
1051 polarity and where epiblast CDH1 may thus be also already<sup>1107</sup>  
1052 isotropically distributed. FOXA2+ and SOX17+ cells that<sup>1108</sup>  
1053 populate the Gastruloids at 120h further pattern according to<sup>1109</sup>  
1054 the anterior-posterior cues of the aggregate, which thus pro-<sup>1110</sup>  
1055 duces anterior foregut (pharyngeal) identities at the anterior,<sup>1111</sup>  
1056 and hindgut identities at the posterior. We thus postulate<sup>1112</sup>  
1057 that Gastruloids could be a valid source for the isolation and<sup>1113</sup>  
1058 further differentiation of specific endodermal identities which<sup>1114</sup>  
1059 may be otherwise more difficult to differentiate *in vitro* (e.g.<sup>1115</sup>  
1060 thymus from anterior foregut tissue).<sup>1116</sup>

## 1061 Materials and methods

1062 **Cell culture.** mESCs ("SBR" Sox1/TBra double reporter<sup>1119</sup>  
1063 cell line described in (Deluz et al., 2016); CRG8 cells<sup>1120</sup>  
1064 of 129P2 background (RRID:CVCL\_3987, Mountford<sup>1121</sup>  
1065 et al. (1994)); or "TFoxA2" FoxA2/TBra double reporter<sup>1122</sup>  
1066 cell line described in (Yang, 2015); E14 cells of 129P2<sup>1123</sup>  
1067 background (RRID:CVCL\_C320, Fehling et al. (2003);<sup>1124</sup>  
1068 Hooper et al. (1987))) were cultured in tissue-culture-treated,<sup>1125</sup>

non-gelatinised, 6well plates, in 10% Serum Medium with  
added 2i and LIF. Cells were split every third day, by  
washing in PBS-/-, adding Accutase for ~3min RT, and  
collecting the resulting cell suspension in a clean centrifuge  
tube. The Accutase of the cell suspension was then diluted  
out 1:10 in 10% Serum Medium, and cells were pelleted  
by centrifuging 200xg, 4min, 4°C. After aspirating out the  
supernatant, the pellet was resuspended in 1mL 10% Serum  
Medium to a single cell suspension, and cell density was  
counted with a haemocytometer. Around 65000-75000 cells  
were transferred to a new well with 2mL pre-equilibrated  
10% Serum Medium (6750-7800 cells/cm<sup>2</sup>). Cells were  
then left in a humidified incubator, 37°C, 5% CO<sub>2</sub>, until  
use or until further splitting 3 days later. NOTE: In most  
cases, splitting was coupled to Gastruloid generation. In  
those cases, the cell pellet was resuspended in N2B27  
rather than 10% Serum Medium + 2i and LIF. A complete,  
step-by-step, protocol is available at:[https://  
dx.doi.org/10.17504/protocols.io.7xbhpin](https://dx.doi.org/10.17504/protocols.io.7xbhpin)  
Recipes:

10% Serum Medium: 86.8% DMEM, high glucose, with Glu-  
taMAX (L-Alanyl-Glutamine, final concentration: 3.45mM),  
10% ES-grade Foetal Bovine Serum, 100U/mL Penicillin,  
100ug/mL Streptomycin, 0.1mM Non Essential Amino  
Acids, 1mM Sodium Pyruvate, 0.1mM beta-mercaptoethanol  
10% Serum Medium + 2i and LIF: add 3uM CHIR99021,  
1uM PD0325901, and 100u/mL LIF.

**Gastruloid generation.** mESCs were washed in PBS-/-,  
detached from adherent culture with Accutase (~3min, RT),  
and collected in a centrifuge tube. The Accutase in the  
cell suspension was then diluted out 1:10 in 10% Serum  
Medium, and cells were pelleted by centrifuging 200xg,  
4min, 4C. The supernatant was removed, and the pellet  
was washed by resuspension in 10mL PBS-/- . Cells were  
re-pelleted by centrifuging 200xg, 4min, 4C and washed  
once more in 10mL fresh PBS-/- . After re-pelleting once  
more (200xg, 4min, 4C), the pellet was dissociated as a  
single-cell suspension in 1mL N2B27 Medium. Cells were  
counted with a haemocytometer, and, for each plate of  
Gastruloids made, 37500 cells (SBR line) or 93750 cells  
(TFoxA2 line) were transferred to 5mL fresh N2B27 (7.5  
cells/uL or 18.75 cells/ul final concentration, respectively).  
The cell suspension was distributed as 40uL droplets (=300  
SBR cells/droplet, or 750 TFoxA2 cells/droplet) in wells of  
a U-bottomed, low-adhesion, 96 well plate, and the plates  
were left for 120h in a humidified incubator, 5% CO<sub>2</sub>, 37°C.  
At 48h after plating, 150uL of 3uM CHIR99021 N2B27  
were added to each well, and this solution was substituted  
with fresh N2B27 (no CHIR) every 24h after that. A step-  
by-step detailed protocol is available at: [https://dx.  
doi.org/10.17504/protocols.io.9j5h4q6](https://dx.doi.org/10.17504/protocols.io.9j5h4q6)

Recipes: 10% Serum Medium: 86.8% DMEM,  
high glucose, with 3.97mM GlutaMAX (L-Alanyl-  
Glutamine, final concentration: 3.45mM), 10%  
ES-grade FBS, 100U/mL Penicillin , 100ug/mL  
Streptomycin, 0.1mM Non Essential Amino Acids,  
1mM Sodium Pyruvate, 1mM beta-mercaptoethanol.

1126 N2B27: 47.4% Neurobasal Medium, 47.4% DMEM/F-1182  
1127 12, with 2.50mM GlutaMAX (L-Alanyl-Glutamine, final1183  
1128 concentration: 1.18mM), 1mM GlutaMAX Supplement1184  
1129 (total concentration: 2.18mM), 100U/mL Penicillin1185  
1130 100ug/mL Streptomycin, 0.1mM Non Essential Amino1186  
1131 Acids, 1mM Sodium Pyruvate, 1mM beta-mercaptoethanol,1187  
1132 1% B27Supplement, serum-free, 0.5% N-2 Supplement. 1188

1133 **Gastruloid immunostaining.** Gastruloids were collected,1190  
1134 at every given timepoint, washed in PBS-/-, and fixed,1191  
1135 in 4% PFA in PBS-/-, for 2h, 4C, on a low-speed or1192  
1136 bital shaker; or 45min, RT, static. Gastruloids were then,1193  
1137 washed in PBS+FT (PBS-/-, 10% ES-grade Foetal Bovine,1194  
1138 Serum, 0.2% Triton-X100), and blocked and permeabilised,1195  
1139 in PBS+FT for 1h, RT, static. Primary antibody solutions  
1140 were then prepared in PBS+FT, with 2ug/mL DAPI. Sam1196  
1141 ples were stained overnight, 4C, on a low-speed orbital1197  
1142 shaker. Similarly, secondary antibody solutions were pre1198  
1143 pared in PBS+FT, 2ug/mL DAPI, and samples were stained,1199  
1144 overnight, 4C, on a low-speed orbital shaker. Gastruloids,1200  
1145 were mounted in Fluoromount-G mounting medium (no1201  
1146 spacers), and slides kept at 4C long term. All antibody,1202  
1147 solutions were washed away after incubation by washes,1203  
1148 in PBS+FT. A detailed, step-by-step protocol is available,1204  
1149 at: <https://dx.doi.org/10.17504/protocols.io.7tzhnp6>. Secondary antibodies used were all from,1205  
1150 Thermo Fisher Scientific: donkey anti-mouse IgG Alexa 647,1207  
1151 (CAT#A-31571, RRID:AB\_162542); donkey anti-rabbit IgG,1208  
1152 Alexa 488 (CAT#A-21206, RRID:AB\_2535792), Alexa 568,1209  
1153 (CAT# A-10042, RRID:AB\_2534017), or Alexa 647 (CAT#,1210  
1154 A-31573, RRID:AB\_2536183); donkey anti-rat IgG Alexa,1211  
1155 488 (CAT#A-21208, RRID:AB\_2535794), goat anti-rat,1212  
1156 Alexa 568 (CAT#A-11077, RRID:AB\_2534121), or Alexa,1213  
1157 647 (CAT#A-21247, RRID:AB\_141778); donkey anti-goat,1214  
1158 IgG Alexa 488 (CAT#A-11055, RRID:AB\_2534102), or,1215  
1159 Alexa 568 (CAT#RRID:AB\_2534104). Details about the pri1216  
1160 mary antibodies used are provided as a supplementary .csv,1217  
1161 file. 1218  
1162 1219

1163 **Gastruloid FACS.** TFoxA2 Gastruloids were grown ac1220  
1164 cording to the protocol described above, and two/four,1221  
1165 96well plates of Gastruloids at each timepoint were used and,1222  
1166 processed for FACS. Briefly, Gastruloids were collected at,1223  
1167 every given timepoint, washed in PBS-/-, and digested 8min,1224  
1168 37C, in Digestion Solution (Collagenase IV [3mg/mL],1225  
1169 Dispase [4mg/mL], DNaseI [100ug/mL], in PBS). Working,1226  
1170 on ice, the cell suspension was then strained through the,1227  
1171 filter cap of a FACS tube, and an excess of cold Staining  
1172 Buffer (10%ES-FBS, Pen-Strep [100U/mL], EDTA [1mM],1228  
1173 in PBS) was added to stop the digestion. Cells were then,1229  
1174 stained with DAPI ([0.2ug/mL] DAPI, in Staining Buffer),1230  
1175 10min, 4C, fixed in 2%PFA, 4C, 10min, and stored in,1231  
1176 Staining Buffer, 4C, in the dark, until use. Standard 2D,1232  
1177 cultures of TFoxA2 mESCs and RFP+ mESCs were used,1233  
1178 as negative and positive references, respectively. These,1234  
1179 were detached in Accutase, 4min, RT, and DAPI-stained and,1235  
1180 fixed as done for filtered Gastruloid cells and as described,1236  
1181 above. GFP BrightComp eBeads™ (Invitrogen/Thermo,1237

Fisher Scientific, CAT#A10514) were used as GFP+ positive  
reference, according to manufacturer protocol (1 drop of  
beads resuspended in 1mL Staining Buffer). A step-by-  
step detailed protocol is available at: <https://dx.doi.org/10.17504/protocols.io.bvgrn3v6>  
Samples were analysed on a Becton Dickinson LSR-  
Fortessa™ Flow Cytometer, with optical configuration  
355nm[450/50], 488nm[530/30], 561nm[585/15], using  
BD FACSDiva™ software, with applied compensation.  
Exported FCS files were analysed in RStudio (ggcyto  
library, Van et al. (2018), and flowCore library, Ellis et al.  
(2021)). The annotated notebook, with a step by step  
walkthrough the entire analysis pipeline, is available at:  
<https://doi.org/10.5281/zenodo.4894122>

**Gastruloid Hybridisation Chain Reaction (HCR).** Gas-  
truloids were collected at every given timepoint, washed  
in PBS-/-, and fixed in 4% PFA in PBS-/-, overnight,  
4C, on a low-speed orbital shaker. Gastruloids were then  
washed in PBS-/-, and then dehydrated in a graded se-  
ries of methanol-PBST solutions (0%-100%, 25%-75%,  
50%-50%, 75%-25%, 100% methanol). Gastruloids were  
then stored in 100% methanol, -20C, until use (and at least  
overnight). When needed, Gastruloids were rehydrated in  
a graded series of methanol-PBST solutions (100%-0%,  
75%-25%, 50%-50%, 25%-75%, 100% PBST), digested  
in 25ug/mL Proteinase K in PBST, 4min, RT, washed in  
PBST, and re-fixed in 4%PFA in PBS-/- for 20min, RT.  
For the probe hybridisation step, samples were washed in  
PBST, pre-incubated 1h30min in warm Probe Hybridisation  
Buffer, 37C, and then incubated for 16-20h with 4pmol of  
odd HCR probes and 4pmol of even HCR probes mixed in  
Probe Hybridisation Buffer, 37C. For the amplification step,  
samples were washed in warm Probe Wash Buffer, 37C,  
further washed in RT 5XSSCT, and then left to incubate  
for 16-20h with 48pmol of hairpin 1 and 48pmol of hairpin  
h2 (for each colour used) mixed in Probe Amplification  
Buffer with 2ug/mL DAPI, RT. Each hairpin was heated  
to 95C for 1min30s, and snap-cooled at RT for at least  
30min before use. After amplification, samples were  
incubated for 1h15min in 5XSSCT with 2ug/mL DAPI,  
washed in 5XSSCT, and then mounted on microscope  
coverslips in Fluoromount G mounting medium. A step-  
by-step detailed protocol is available at: <https://dx.doi.org/10.17504/protocols.io.bcwfixbn>  
The sequences of the *Pax9* probe set used (coupled to  
amplifier B5), is provided as a supplementary file.

**Processing of scRNAseq datasets.** All data analysis  
was done on R, with the Seurat v4.0 library (Hao et al.,  
2020) **Gastruloid dataset:** scRNAseq data corresponding to  
Gastruloids spanning timepoints t=96-168h was taken from  
Rossi et al. (2019). Raw count matrices for both batches of  
each timepoint and for different timepoints were merged,  
and filtered based on the following quality control param-  
eters: *number of Unique molecular identifiers* > 10000,  
*number of Genes* > 2000, *Complexity* > 0.75, *Percentage*  
*of mitochondrial genes* < 15%. Genes expressed in 0 or

less than 5 cells of the dataset were discarded. The data underwent normalisation, variance stabilisation, and differences due to mitochondrial content and cell cycle phase were regressed out via Seurat's *NormalizeData* and *SCTransform* functions. Data from different timepoints was integrated using *SelectIntegrationFeatures* on the top 3000 genes, *FindIntegrationAnchors*, and *IntegrateData*. PCA and UMAP (on the first 40 dimensions) were then calculated through *RunPCA* and *RunUMAP*, respectively. Clustering was done via the functions *FindNeighbours* and *FindClusters*, by a shared nearest neighbor (SNN) modularity optimization based clustering algorithm on a SNN graph based on the 20 nearest neighbours (default). A resolution of 0.8 was chosen to proceed with analysis. Cluster identities were assigned based on the patterns of expression of selected marker genes, along with an analysis of the genes marking each cluster (*FindAllMarkers* function, limiting testing to genes which showed, on average, at least 0.25-fold difference (log-scale) between the two groups of cells; default). Top genes were ranked based on the difference between their pct.1 and pct.2 values (i.e. between the percentage of cells expressing a given gene in the cluster of interest versus in the other clusters combined). To find markers differentiating close clusters, the function *FindMarkers* was used instead. The annotated notebook, with a step by step walkthrough the entire analysis pipeline, is available at: [https://github.com/StefanoVianello/Endoderm\\_scrRNAseq](https://github.com/StefanoVianello/Endoderm_scrRNAseq), "Gastruloid\_scrRNAseq\_preprocessing\_RNotebook.Rmd".

**Gut endoderm dataset:** scRNAseq data corresponding to Gut endoderm cells at Embryonic Day 8.75 was taken from Nowotschin et al. (2019b). The raw count matrix was imported as a Seurat object and filtered based on the following quality control parameters: *number of Unique molecular identifiers* > 5000, *number of Genes* > 3000, *Complexity* > 0.75, *Percentage of mitochondrial genes* < 20%. Genes expressed in 0 or less than 5 cells of the dataset were discarded. The data underwent normalisation, variance stabilisation, and differences due to mitochondrial content and cell cycle phase were regressed out via Seurat's *NormalizeData* and *SCTransform* functions. PCA and UMAP (on the first 30 dimensions) were then calculated through *RunPCA* and *RunUMAP*, respectively. *In vivo* and *in vitro* data was integrated using *SelectIntegrationFeatures* on the top 3000 genes, *FindIntegrationAnchors*, and *IntegrateData*. PCA and UMAP (on the first 40 dimensions) were then calculated through *RunPCA* and *RunUMAP*, respectively. Clustering was done via the functions *FindNeighbours* and *FindClusters*, by a shared nearest neighbor (SNN) modularity optimization based clustering algorithm on a SNN graph based on the 20 nearest neighbours (default). A resolution of 0.8 was chosen to proceed with analysis. Cluster identities were assigned based on the patterns of expression of selected marker genes, along with an analysis of the genes marking each cluster (*FindMarkers* function, limiting testing to genes which showed, on average, at least 0.25-fold difference (log-scale) between the two groups of cells; default). Top

genes were ranked based on the difference between their pct.1 and pct.2 values (see explanation above). The annotated notebook, with a step by step walkthrough the entire analysis pipeline, is available at: [https://github.com/StefanoVianello/Endoderm\\_scrRNAseq](https://github.com/StefanoVianello/Endoderm_scrRNAseq), "GutTube\_scrRNAseq\_preprocessing\_RNotebook.Rmd".

**Alignment of Gastruloid and Gut tube cells:** Cells corresponding to endoderm clusters were subsetted from the Rossi et al. (2019) dataset, processed as described above. The identification of the endoderm clusters is justified in this manuscript. Cells corresponding to the embryonic gut tube were subsetted from the Nowotschin et al. (2019b) dataset, processed as described above. The gut tube cluster is the biggest cluster in the dataset, and its endodermal identity was confirmed based on the expression of classic endodermal markers. The count matrices of the two subsetted datasets (*in vitro* endoderm and *in vivo* endoderm) were merged into a single object and processed according to standard pipeline. Genes expressed in 0 or less than 5 cells of the dataset were discarded. The data underwent normalisation, variance stabilisation, and differences due to mitochondrial content and cell cycle phase were regressed out via Seurat's *NormalizeData* and *SCTransform* functions. PCA and UMAP (on the first 30 dimensions) were then calculated through *RunPCA* and *RunUMAP*, respectively. Clustering was done via the functions *FindNeighbours* and *FindClusters*, by a shared nearest neighbor (SNN) modularity optimization based clustering algorithm on a SNN graph based on the 20 nearest neighbours (default). A resolution of 0.8 was chosen to proceed with analysis. Cluster identities were assigned based on the patterns of expression of selected marker genes, along with an analysis of the genes marking each cluster (*FindAllMarkers* function, limiting testing to genes which showed, on average, at least 0.25-fold difference (log-scale) between the two groups of cells; default). Top genes were ranked based on the difference between their pct.1 and pct.2 values (see explanation above). To find markers differentiating close clusters, the function *FindMarkers* was used instead. The annotated notebook, with a step by step walkthrough the entire analysis pipeline, is available at: [https://github.com/StefanoVianello/Endoderm\\_scrRNAseq](https://github.com/StefanoVianello/Endoderm_scrRNAseq), "Endoderm\_comparison\_RNotebook.Rmd".

**Gastruloid imaging and image processing.** Bright-field images of Gastruloids were taken on either a Nikon Ti inverted spinning-disk microscope (for the series in Figure 2A), or an Olympus CellIR inverted widefield microscope (for the image on Figure 4B, UPLAN S APO 10x/0.40 air objective, CCD Grayscale Hamamatsu ORCA ER B7W Camera; Olympus XCellence software for data capture). Both microscope setups had CO<sub>2</sub> and temperature control (37°C and 5% CO<sub>2</sub>). Live imaging of TFoxA2 reporter Gastruloids was done on the Olympus CellIR inverted widefield microscope described above, with acquisition every 30min (5 z-slices, 27.5um spacing) Immunostained Gastruloids were imaged on a Zeiss

1352 LSM700 inverted confocal microscope (Plan-Apochromat  
1353 20x/0.80 air objective, motorized stage, LED Lumen-  
1354 cor SOLA Illumination, CCD Grayscale Axiocam  
1355 MRm (B/W) Camera; ZEN 2009 software for data  
1356 capture) or on a Zeiss LSM780 inverted confocal mi-  
1357 croscope (for the CDH1 projection in Figure 4A, Plan-  
1358 Apochromat 20x/0.80 air objective, motorized stage).  
1359 Images were opened, stitched, and processed for publication  
1360 (LUT assignment, channel display, min and max intensity,  
1361 thresholding based on no-primary control) using the Fiji  
1362 ImageJ distribution (Rueden et al., 2017; Schindelin et al.,  
1363 2012), and the "Grid/Collection Stitching" plugin therein  
1364 (Preibisch et al., 2009). The depth-coded reconstruction in  
1365 Figure 4A was generated using the "Temporal-Color Code"  
1366 ([https://imagej.net/Temporal-Color\\_Code](https://imagej.net/Temporal-Color_Code))  
1367 function. The blue, orange, and purple LUTs used through-  
1368 out the figures were designed by Christophe Leterrier,  
1369 (<https://github.com/cleterrier/ChrisLUTs>,  
1370 "BOP" palette).

1371 **Quantification of AP patterning.** Batch quantification of  
1372 immunostaining signal intensity along the AP axis of the  
1373 Gastruloids was performed through a custom processing  
1374 pipeline available as a Jupyter notebook at [https://doi](https://doi.org/10.5281/zenodo.4899121)  
1375 [org/10.5281/zenodo.4899121](https://doi.org/10.5281/zenodo.4899121) and outlined as fol-  
1376 lows (step-by-step walk through provided in the notebook  
1377 itself). The pipeline takes two inputs: i) the multichannel  
1378 raw image resulting from the scan of an entire microscope  
1379 slide of immunostained and mounted Gastruloids (here ac-  
1380 quired on a GE Healthcare IN Cell Analyzer 2200 automated  
1381 microscope) and ii) hand-traced line coordinates defining the  
1382 central axis of each Gastruloid on the slide (starting from the  
1383 posterior). At early timepoints where the posterior of the  
1384 Gastruloid is not distinguishable morphologically, the area  
1385 of TBra polarisation is to be used instead. The script then  
1386 subdivides each interval of the line ROI provided into  $n$  finer  
1387 intervals of equal length (thus avoiding to have to manually  
1388 draw a line with high number of points; here  $n=10$ ), and for  
1389 each point along the line it defines a non-overlapping polygon  
1390 mask covering an area of thickness  $N$  (here  $N=500$ px) across  
1391 the line and whose lateral edges are orthogonal to the line it-  
1392 self at each side of the point. Having computed the mask, the  
1393 script then assigns the total signal intensity recovered in the  
1394 area to the point of the line ROI around which the polygon  
1395 was constructed, thus effectively assigning signal intensities  
1396 to points that can be ordered along an x-axis. These raw val-  
1397 ues are then normalised by the number of cells in the area  
1398 (using the DAPI nuclear intensity as a proxy) and both posi-  
1399 tion along the length of the Gastruloid and signal intensity are  
1400 normalised to the absolute length of the Gastruloid and to the  
1401 maximal DAPI-normalised intensity value. The script out-  
1402 puts lineplots and scatterplots for each Gastruloid analysed,  
1403 summary lineplots and scatterplots with collated data of all  
1404 gastruloids analysed, and the tabulated raw data for re-use.

#### 1405 ACKNOWLEDGEMENTS

1406 We thank the Lickert lab (Helmholtz Zentrum München) for sharing the FoxA2/TBra  
1407 double reporter cell line used. We would like to acknowledge the work and support  
1408 provided by the staff of the following EPFL core facilities: the Biolmaging and Op-

tics Platform (BIOP), the Biomolecular Screening Facility (BSF), the Histology Core  
Facility, the Flow Cytometry Core Facility (FCCF). We also want to acknowledge the  
work of the entire staff of the Glassware Washing facility (Laverie), as well as EPFL  
cleaning staff. This work would have not been possible without their contribution.  
The pipeline designed to quantify AP patterning in Gastruloids was constructed in  
collaboration with Paul Gerald Layague Sanchez and Arianne Bercowsky-Rama,  
whom we sincerely thank. We would also like to acknowledge our lab manager  
Stephanie Boy-Rottinger for her heartfelt support throughout. In addition, we are  
thankful to Ricardo Henriques for kindly sharing the template that was used to  
format this preprint. We also thank Alfonso Martinez Arias and Heiko Lickert for  
valuable feedback on the first uploaded bioRxiv version of this manuscript. This  
research was funded by a Sinergia grant (CRSII5\_189956) from the Swiss National  
Science Foundation and Ecole Polytechnique Fédérale de Lausanne (EPFL).

#### 1409 COMPETING FINANCIAL INTERESTS

1410 The authors declare no competing financial interests.

## 1411 Bibliography

- Allman, G. J. (1854). On the anatomy and physiology of Cordylophora a contribution to our  
knowledge of the tubularian zoophytes. *Abstracts of the Papers Communicated to the Royal  
Society of London*, 6, 319–321.  
URL <https://doi.org/10.1098%2Frspl.1850.0118>
- Anderson, W. J., Zhou, Q., Alcalde, V., Kaneko, O. F., Blank, L. J., Sherwood, R. I., Guseh, J. S.,  
Rajagopal, J., & Melton, D. A. (2008). Genetic targeting of the endoderm with claudin-6creer.  
*Developmental Dynamics*, 237(2), 504–512.
- Anlaş, K., Gritti, N., Oriola, D., Arató, K., Nakaki, F., Le Lim, J., Sharpe, J., & Trivedi, V. (2021).  
Dynamics of anteroposterior axis establishment in a mammalian embryo-like system. *bioRxiv*.
- Arnold, S. J., & Robertson, E. J. (2009). Making a commitment: cell lineage allocation and axis  
patterning in the early mouse embryo. *Nature Reviews Molecular Cell Biology*, 10(2), 91–  
103.  
URL <https://doi.org/10.1038%2Fnmr2618>
- Baillie-Johnson, P., van den Brink, S. C., Balayo, T., Turner, D. A., & Arias, A. M. (2015). Genera-  
tion of Aggregates of Mouse Embryonic Stem Cells that Show Symmetry Breaking Polariza-  
tion and Emergent Collective Behaviour emIn Vitro/em. *Journal of Visualized Experiments*,  
(105).  
URL <https://doi.org/10.3791%2F53252>
- Bardot, E., Calderon, D., Santoriello, F., Han, S., Cheung, K., Jadhav, B., Bartscher, I., Artap,  
S., Jain, R., Epstein, J., Lickert, H., Gouon-Evans, V., Sharp, A. J., & Dubois, N. C. (2017).  
Foxa2 identifies a cardiac progenitor population with ventricular differentiation potential. *Nature  
Communications*, 8(1).  
URL <https://doi.org/10.1038%2Fncoms14428>
- Bardot, E. S., & Hadjantonakis, A.-K. (2020). Mouse gastrulation: Coordination of tissue pattern-  
ing specification and diversification of cell fate. *Mechanisms of Development*, (p. 103617).  
URL <https://doi.org/10.1016%2Fj.mod.2020.103617>
- Beccari, L., Moris, N., Girgin, M., Turner, D. A., Baillie-Johnson, P., Cossy, A.-C., Lutolf, M. P.,  
Duboule, D., & Arias, A. M. (2018). Multi-axial self-organization properties of mouse embry-  
onic stem cells into gastruloids. *Nature*, 562(7726), 272–276.  
URL <https://doi.org/10.1038%2F541586-018-0578-0>
- Beck, F., Erler, T., Russell, A., & James, R. (1995). Expression of Cdx-2 in the mouse embryo  
and placenta: Possible role in patterning of the extra-embryonic membranes. *Developmental  
Dynamics*, 204(3), 219–227.  
URL <https://doi.org/10.1002%2Faja.1002040302>
- Bérenger-Currias, N. M. L. P., Mircea, M., Adegeest, E., van den Berg, P. R., Feliksik, M.,  
Hochane, M., Idema, T., Tans, S. J., & Semrau, S. (2020). Early neurulation recapitulated  
in assemblies of embryonic and extraembryonic cells.  
URL <https://doi.org/10.1101%2F2020.02.13.947655>
- Biben, C., Wang, C.-C., & Harvey, R. P. (2004). Nkx-2 class homeobox genes and pharyngeal/oral  
patterning: Nkx2-3 is required for salivary gland and tooth morphogenesis. *International  
Journal of Developmental Biology*, 46(4), 415–422.
- Burtscher, I., & Lickert, H. (2009). Foxa2 regulates polarity and epithelialization in the endoderm  
germ layer of the mouse embryo. *Development*, 136(6), 1029–1038.  
URL <https://doi.org/10.1242%2Fdev.028415>
- Cano, A., Pérez-Moreno, M. A., Rodrigo, I., Locascio, A., Blanco, M. J., del Barrio, M. G., Portillo,  
F., & Nieto, M. A. (2000). The transcription factor Snail controls epithelial-mesenchymal  
transitions by repressing E-cadherin expression. *Nature Cell Biology*, 2(2), 76–83.  
URL <https://doi.org/10.1038%2F35000025>
- Carlson, B. M. (2014). Digestive and Respiratory Systems and Body Cavities. In *Human Embry-  
ology and Developmental Biology*, (pp. 335–375). Elsevier.  
URL <https://doi.org/10.1016%2FB978-1-4557-2794-0.00015-2>
- Carver, E. A., Jiang, R., Lan, Y., Oram, K. F., & Gridley, T. (2001). The Mouse Snail Gene  
Encodes a Key Regulator of the Epithelial-Mesenchymal Transition. *Molecular and Cellular  
Biology*, 21(23), 8184–8188.  
URL <https://doi.org/10.1128%2Fmcb.21.23.8184-8188.2001>
- Cermola, F., D'Aniello, C., Tatè, R., De Cesare, D., Martinez-Arias, A., Minchiotti, G., & Patriarca,  
E. J. (2019). Gastruloid development competence discriminates different states of pluripo-  
tency between naive and primed. *bioRxiv*, (p. 664920).
- Chazaud, C., Yamanaka, Y., Pawson, T., & Rossant, J. (2006). Early Lineage Segregation be-  
tween Epiblast and Primitive Endoderm in Mouse Blastocysts through the Grb2-MAPK Path-  
way. *Developmental Cell*, 10(5), 615–624.  
URL <https://doi.org/10.1016%2Fj.devcel.2006.02.020>
- Cheng, T., Xing, Y., Li, Y., Liu, C., Huang, Y., Zhang, Y., Megason, S., & Xu, P. (2021). Single cell  
response landscape of graded nodal signaling in zebrafish explants. *bioRxiv*.
- Choi, E., Kraus, M. R.-C., Lemaire, L. A., Yoshimoto, M., Vemula, S., Potter, L. A., Manduchi,  
E., Stoeckert, C. J., Grapin-Botton, A., & Magnuson, M. A. (2012). Dual Lineage-Specific



- 1663 Thomas, P., Brown, A., & Beddington, R. (1998). Hex: a homeobox gene revealing peri-  
1664 implantation asymmetry in the mouse embryo and an early transient marker of endothelial  
1665 cell precursors. *Development*, *125*(1), 85–94.
- 1666 Timmer, J. R., Mak, T. W., Manova, K., Anderson, K. V., & Niswander, L. (2005). Tissue morpho-  
1667 genesis and vascular stability require the *frem2* protein, product of the mouse myelencephalic  
1668 blebs gene. *Proceedings of the National Academy of Sciences*, *102*(33), 11746–11750.
- 1669 Toda, S., Blauch, L. R., Tang, S. K. Y., Morsut, L., & Lim, W. A. (2018). Programming self-  
1670 organizing multicellular structures with synthetic cell-cell signaling. *Science*, (p. eaat0271).  
1671 URL <https://doi.org/10.1126/science.aat0271>
- 1672 Turner, D., Baillie-Johnson, P., & Martinez, A. A. (2016). Organoids and the genetically encoded  
1673 self-assembly of embryonic stem cells. *Bioessays*, *38*, 181–91.
- 1674 Turner, D. A., Girgin, M., Alonso-Crisostomo, L., Trivedi, V., Baillie-Johnson, P., Glodowski, C. R.,  
1675 Hayward, P. C., Collignon, J., Gustavsen, C., Serup, P., Steventon, B., Lutolf, M. P., & Arias,  
1676 A. M. (2017). Anteroposterior polarity and elongation in the absence of extra-embryonic tis-  
1677 sues and of spatially localised signalling in gastruloids: mammalian embryonic organoids.  
1678 *Development*, *144*(21), 3894–3906.  
1679 URL <https://doi.org/10.1242/dev.150391>
- 1680 Van, P., Jiang, W., Gottardo, R., & Finak, G. (2018). ggcyto: next generation open-source visual-  
1681 ization software for cytometry. *Bioinformatics*, *34*(22), 3951–3953.
- 1682 van den Brink, S. C., Alemany, A., van Batenburg, V., Moris, N., Blotenburg, M., Vivié, J., Baillie-  
1683 Johnson, P., Nichols, J., Sonnen, K. F., Arias, A. M., & van Oudenaarden, A. (2020). Single-  
1684 cell and spatial transcriptomics reveal somitogenesis in gastruloids. *Nature*.  
1685 URL <https://doi.org/10.1038/s41586-020-2024-3>
- 1686 van den Brink, S. C., Baillie-Johnson, P., Balayo, T., Hadjantonakis, A.-K., Nowotschin, S., Turner,  
1687 D. A., & Arias, A. M. (2014). Symmetry breaking germ layer specification and axial organisa-  
1688 tion in aggregates of mouse embryonic stem cells. *Development*, *141*(22), 4231–4242.  
1689 URL <https://doi.org/10.1242/dev.113001>
- 1690 Veenvliet, J. V., Bolondi, A., Kretzmer, H., Haut, L., Scholze-Wittler, M., Schifferli, D., Koch, F.,  
1691 Pustet, M., Heimann, S., Buschow, R., Wittler, L., Timmermann, B., Meissner, A., & Her-  
1692 rmann, B. G. (2020). Mouse embryonic stem cells self-organize into trunk-like structures with  
1693 neural tube and somites.  
1694 URL <https://doi.org/10.1101/2020.03.04.974949>
- 1695 Viotti, M., Nowotschin, S., & Hadjantonakis, A.-K. (2014). SOX17 links gut endoderm morpho-  
1696 genesis and germ layer segregation. *Nature Cell Biology*, *16*(12), 1146–1156.  
1697 URL <https://doi.org/10.1038/ncb3070>
- 1698 Wei, Q., & Condie, B. G. (2011). A focused in situ hybridization screen identifies candidate  
1699 transcriptional regulators of thymic epithelial cell development and function. *PLoS One*, *6*(11),  
1700 e26795.
- 1701 Williams, M., Burdsal, C., Periasamy, A., Lewandoski, M., & Sutherland, A. (2011). Mouse prim-  
1702 itive streak forms in situ by initiation of epithelial to mesenchymal transition without migration  
1703 of a cell population. *Developmental Dynamics*, *241*(2), 270–283.  
1704 URL <https://doi.org/10.1002/dvdy.23711>
- 1705 Wood, H. B., & Episkopou, V. (1999). Comparative expression of the mouse *sox1*, *sox2* and *sox3*  
1706 genes from pre-gastrulation to early somite stages. *Mechanisms of development*, *86*(1-2),  
1707 197–201.
- 1708 Yamanaka, Y., Tamplin, O. J., Beckers, A., Gossler, A., & Rossant, J. (2007). Live Imaging and  
1709 Genetic Analysis of Mouse Notochord Formation Reveals Regional Morphogenetic Mecha-  
1710 nisms. *Developmental Cell*, *13*(6), 884–896.  
1711 URL <https://doi.org/10.1016/j.devcel.2007.10.016>
- 1712 Yang, D. (2015). *Novel mechanisms of endoderm and mesoderm formation*. Ph.D. thesis, Tech-  
1713 nische Universität München.
- 1714 Zhang, Z., Cerrato, F., Xu, H., Vitelli, F., Morishima, M., Vincentz, J., Furuta, Y., Ma, L., Martin,  
1715 J. F., Baldini, A., et al. (2005). *Tbx1* expression in pharyngeal epithelia is necessary for  
1716 pharyngeal arch artery development. *Development*, *132*(23), 5307–5315.
- 1717 Zhuang, S., Zhang, Q., Zhuang, T., Evans, S. M., Liang, X., & Sun, Y. (2013). Expression of *isl1*  
1718 during mouse development. *Gene Expression Patterns*, *13*(8), 407–412.
